# Supplementary material
Source: MDPI journal article supplement (https://www.mdpi.com/search?q=antibiotics-09-00537)
Supplement: s001 [file antibiotics-09-00537-s001.pdf]

# Synthesis of novel stilbene-coumarins derivatives, and antifungal screening of *Monotes kerstingii* specialized metabolites against *Fusarium oxysporum*

Ghislain Wabo Fotso<sup>1,4</sup>, Bathelémy Ngameni<sup>2,3\*</sup>, Thomas E. Storr<sup>3</sup>, Bonaventure Tchaleu Ngadjui<sup>1</sup>, Sibongile Mafu<sup>4\*\*</sup> and G. Richard Stephenson<sup>3</sup>

<sup>1</sup> Department of Organic Chemistry, Faculty of Science University of Yaoundé 1, P.O. Box 812 Yaoundé, Cameroon

<sup>2</sup> Department of Pharmacognosy and Pharmaceutical Chemistry, Faculty of Medicine and Biomedical Sciences, University of Yaoundé I, P.O. Box 1364, Yaoundé, Cameroon

<sup>3</sup> School of Chemistry, University of East Anglia, Norwich Research Park, Norwich NR4 7TJ, UK

<sup>4</sup> Department of Biochemistry and Molecular Biology, University of Massachusetts

Correspondence: bath\_ngameni@yahoo.fr; Tel.: +237 690 230 281 (B.N)  
[smafu@umass.edu](mailto:smafu@umass.edu), Tel.: +1 413 545 4083 (S.M)

Received: date; Accepted: date; Published: date

**Abstract:** *Fusarium* is one of the most toxigenic phytopathogen causing diseases and reduced agricultural productivity worldwide. Current chemical fungicides exhibit toxicity against non-target organisms, triggering negative environmental impact and danger to consumers. In order to explore the chemical diversity of plants for potential antifungal applications, crude extract and fractions from *Monotes kerstingii* were screened for their activity against two multi-resistant *Fusarium oxysporum* strains: *Fo32931* and *Fo4287*. Antifungal activity was evaluated by the determination of minimum inhibitory concentration (MIC) by broth dilution of fermentative yeasts using kinetic OD<sub>600 nm</sub> reading by a spectrophotometer. The *n*-butanol fraction showed the best activity against *Fo4287*. We screened eleven previously reported natural compounds isolated from different fractions and a stilbene-coumarin 5-[(1*E*)-2-(4-hydroxyphenyl)ethenyl]-4,7-dimethoxy-3-methyl-2*H*-1-benzopyran-2-one (**1**) was the most active compound against both strains. Compound **1** was employed as a nucleophile with a selection of electrophilic derivatizing agents to synthesize five novel stilbene-coumarin analogues. These semisynthetic derivatives showed moderate activity against *Fo32931* with only the prenylated derivative exhibiting activity comparable to the natural stilbene coumarin (**1**), demonstrating the key role of the phenolic group.

**Keywords:** *Monotes kerstingii*, antifungal activity, *Fusarium oxysporum*, semisynthesis, stilbene-coumarins.

|                                                                                                                                                                                                        |    |
|--------------------------------------------------------------------------------------------------------------------------------------------------------------------------------------------------------|----|
| <b>Figure S1:</b> Inhibition growth curves of PDB neat (negative control) and Nystatin (positive control) at different concentrations against <i>Fo32931</i> (A) and <i>Fo4287</i> (B).....            | 3  |
| <b>Figure S2:</b> MIC of <i>Monotes kerstingii</i> stem bark crude extract against <i>Fo32931</i> (A) and <i>Fo4287</i> (B).....                                                                       | 4  |
| <b>Figure S3:</b> MIC of hexane fraction against <i>Fo4287</i> (A), ethyl acetate fraction against <i>Fo4287</i> (B), n-butanol fraction against <i>Fo32931</i> (C) and against <i>Fo4287</i> (D)..... | 4  |
| <b>Figure S4:</b> MIC of the most active natural compounds: stilbene-coumarin 1 (A) and (B); ellagic acid derivatives 5 and 6 (C) and (D) against <i>Fo32931</i> and <i>Fo4287</i> .....               | 5  |
| <b>Figure S5:</b> MIC of the hemisynthetic prenylated compound <b>1c</b> against <i>Fo32931</i> .....                                                                                                  | 5  |
| <b>Figure S6:</b> HRESIMS spectrum of compound <b>1a</b> .....                                                                                                                                         | 6  |
| <b>Figure S7:</b> IR spectrum of compound <b>1a</b> .....                                                                                                                                              | 6  |
| <b>Figure S8:</b> <sup>1</sup> H NMR (CDCl <sub>3</sub> , 500 MHz) spectrum of compound <b>1a</b> .....                                                                                                | 7  |
| <b>Figure S9:</b> COSY spectrum of compound <b>1a</b> .....                                                                                                                                            | 7  |
| <b>Figure S10:</b> <sup>13</sup> C NMR spectrum (CDCl <sub>3</sub> , 125 MHz) of compound <b>1a</b> .....                                                                                              | 8  |
| <b>Figure S11:</b> DEPT 135 spectrum of compound <b>1a</b> .....                                                                                                                                       | 8  |
| <b>Figure S12:</b> HSQC spectrum of compound <b>1a</b> .....                                                                                                                                           | 9  |
| <b>Figure S13:</b> HMBC spectrum of compound <b>1a</b> .....                                                                                                                                           | 9  |
| <b>Figure S14:</b> ROESY spectrum of compound <b>1a</b> .....                                                                                                                                          | 10 |
| <b>Figure S15:</b> HRESIMS spectrum of compound <b>1b</b> .....                                                                                                                                        | 10 |
| <b>Figure S16:</b> IR spectrum of compound <b>1b</b> .....                                                                                                                                             | 11 |
| <b>Figure S17:</b> <sup>1</sup> H NMR spectrum (CDCl <sub>3</sub> , 500 MHz) of compound <b>1b</b> .....                                                                                               | 11 |
| <b>Figure S18:</b> COSY spectrum of compound <b>1b</b> .....                                                                                                                                           | 12 |
| <b>Figure S19:</b> <sup>13</sup> C NMR spectrum (CDCl <sub>3</sub> , 125 MHz) of compound <b>1b</b> .....                                                                                              | 12 |
| <b>Figure S20:</b> DEPT 135 spectrum of compound <b>1b</b> .....                                                                                                                                       | 13 |
| <b>Figure S21:</b> HSQC spectrum of compound <b>1b</b> .....                                                                                                                                           | 13 |
| <b>Figure S22:</b> HMBC spectrum of compound <b>1b</b> .....                                                                                                                                           | 14 |
| <b>Figure S23:</b> NOESY spectrum of compound <b>1b</b> .....                                                                                                                                          | 14 |
| <b>Figure S24:</b> HRESIMS spectrum of compound <b>1c</b> .....                                                                                                                                        | 15 |
| <b>Figure S25:</b> IR spectrum of compound <b>1c</b> .....                                                                                                                                             | 15 |
| <b>Figure S26:</b> <sup>1</sup> H NMR spectrum (CDCl <sub>3</sub> , 500 MHz) of compound <b>1c</b> .....                                                                                               | 16 |
| <b>Figure S27:</b> COSY spectrum of compound <b>1c</b> .....                                                                                                                                           | 16 |
| <b>Figure S28:</b> <sup>13</sup> C NMR spectrum (CDCl <sub>3</sub> , 125 MHz) of compound <b>1c</b> .....                                                                                              | 17 |
| <b>Figure S29:</b> DEPT 135 spectrum of compound <b>1c</b> .....                                                                                                                                       | 17 |
| <b>Figure S30:</b> HSQC spectrum of compound <b>1c</b> .....                                                                                                                                           | 18 |
| <b>Figure S31:</b> HMBC spectrum of compound <b>1c</b> .....                                                                                                                                           | 18 |
| <b>Figure S32:</b> NOESY spectrum of compound <b>1c</b> .....                                                                                                                                          | 19 |
| <b>Figure S33:</b> HRESIMS spectrum of compound <b>1d</b> .....                                                                                                                                        | 19 |
| <b>Figure S34:</b> IR spectrum of compound <b>1d</b> .....                                                                                                                                             | 20 |
| <b>Figure S35:</b> <sup>1</sup> H NMR spectrum (CDCl <sub>3</sub> , 500 MHz) of compound <b>1d</b> .....                                                                                               | 20 |
| <b>Figure S36:</b> COSY spectrum of compound <b>1d</b> .....                                                                                                                                           | 21 |
| <b>Figure S37:</b> <sup>13</sup> C NMR spectrum (CDCl <sub>3</sub> , 125 MHz) of compound <b>1d</b> .....                                                                                              | 21 |
| <b>Figure S38:</b> DEPT 135 spectrum of compound <b>1d</b> .....                                                                                                                                       | 22 |
| <b>Figure S39:</b> HSQC spectrum of compound <b>1d</b> .....                                                                                                                                           | 22 |
| <b>Figure S40:</b> HMBC spectrum of compound <b>1d</b> .....                                                                                                                                           | 23 |
| <b>Figure S41:</b> NOESY spectrum of compound <b>1d</b> .....                                                                                                                                          | 23 |
| <b>Figure S42:</b> HRESIMS spectrum of compound <b>1e</b> .....                                                                                                                                        | 24 |
| <b>Figure S43:</b> IR spectrum of compound <b>1e</b> .....                                                                                                                                             | 24 |
| <b>Figure S44:</b> <sup>1</sup> H NMR spectrum (CDCl <sub>3</sub> , 500 MHz) of compound <b>1e</b> .....                                                                                               | 25 |
| <b>Figure S45:</b> COSY spectrum of compound <b>1e</b> .....                                                                                                                                           | 25 |
| <b>Figure S46:</b> <sup>13</sup> C NMR spectrum (CDCl <sub>3</sub> , 125 MHz) of compound <b>1e</b> .....                                                                                              | 26 |
| <b>Figure S47:</b> DEPT 135 spectrum of compound <b>1e</b> .....                                                                                                                                       | 26 |
| <b>Figure S48:</b> HSQC spectrum of compound <b>1e</b> .....                                                                                                                                           | 27 |
| <b>Figure S49:</b> HMBC spectrum of compound <b>1e</b> .....                                                                                                                                           | 27 |

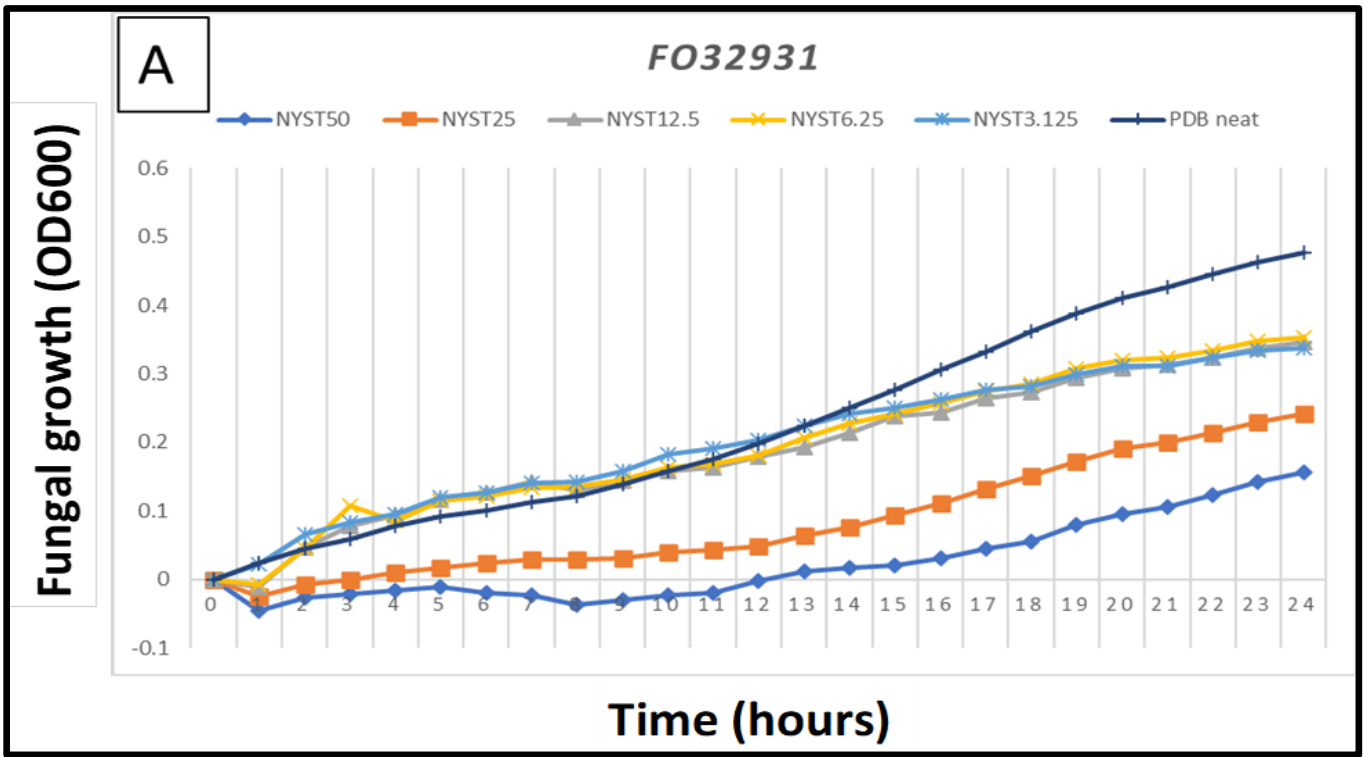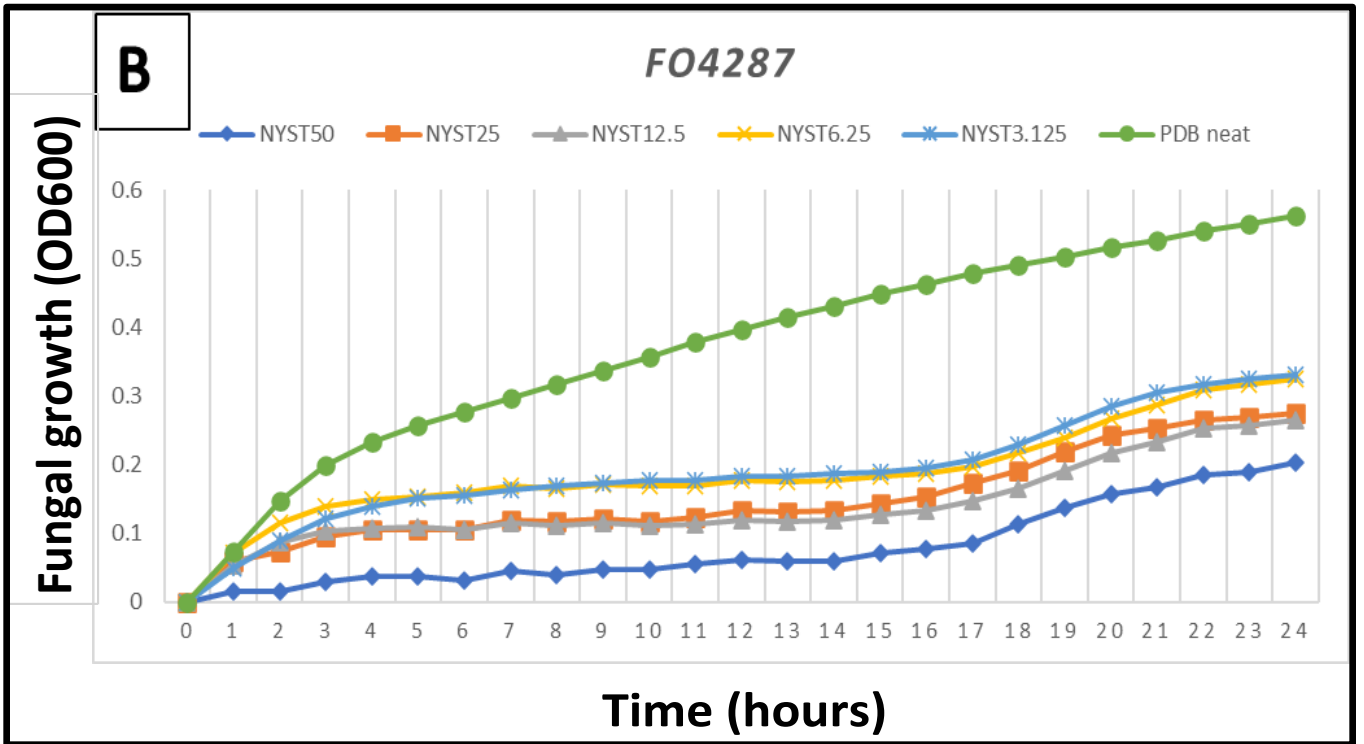

Figure S1: Fungal growth curves of *Fo32931* (A) and *Fo4287* (B) in PDB neat (negative control) and Nystatin at different concentrations (positive control)

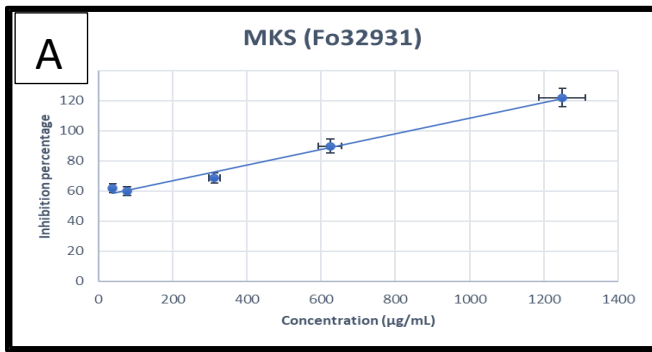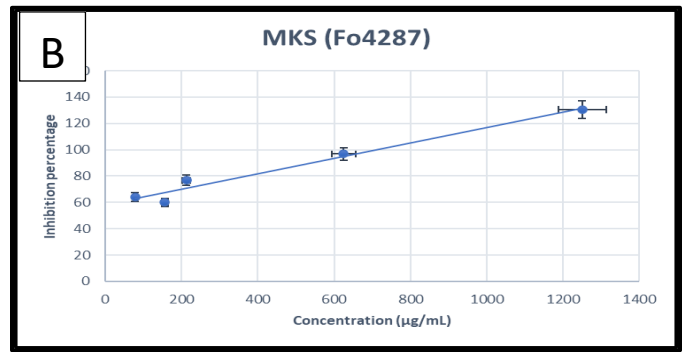

**Figure S2:** MIC of *Monotes kerstingii* stem bark crude extract against *Fo32931* (A) and *Fo4287* (B)

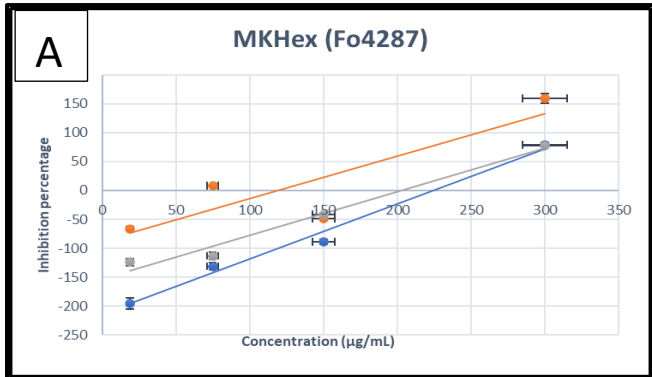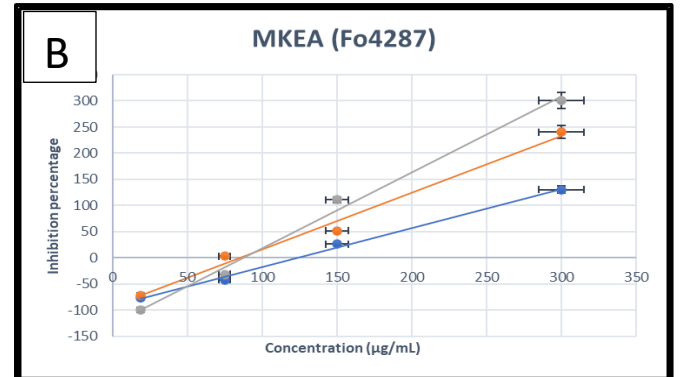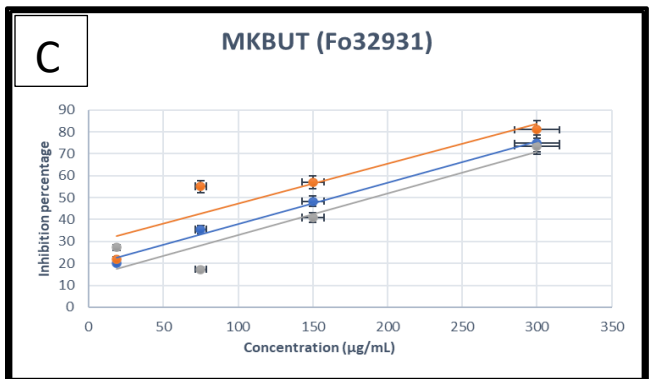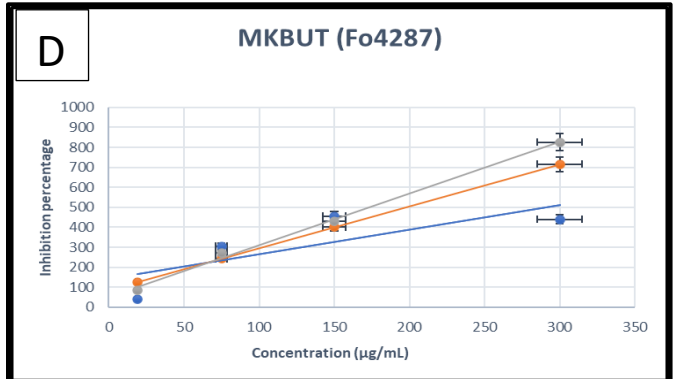

**Figure S3:** MIC of hexane fraction against *Fo4287* (A), ethyl acetate fraction against *Fo4287* (B), n-butanol fraction against *Fo32931* (C) and against *Fo4287* (D).

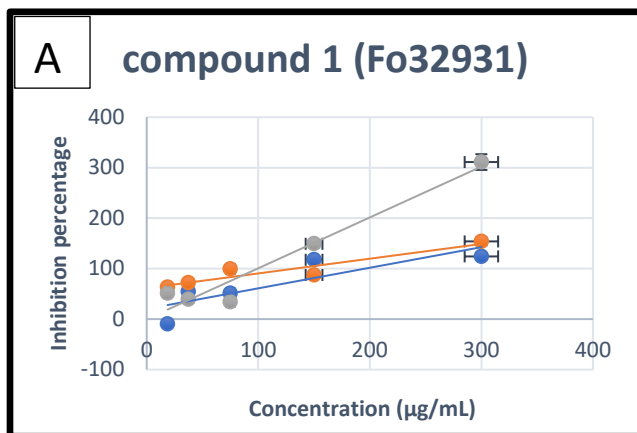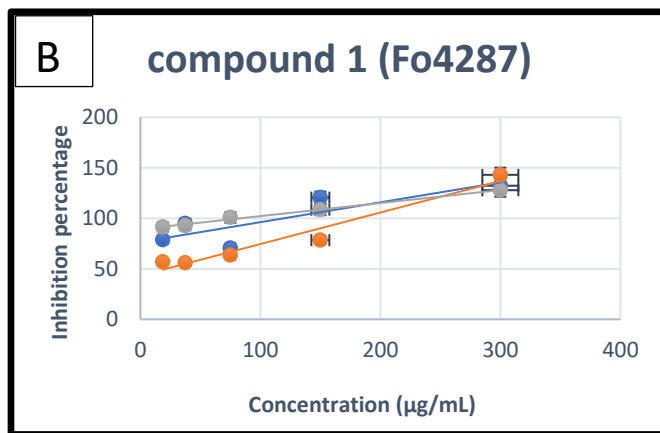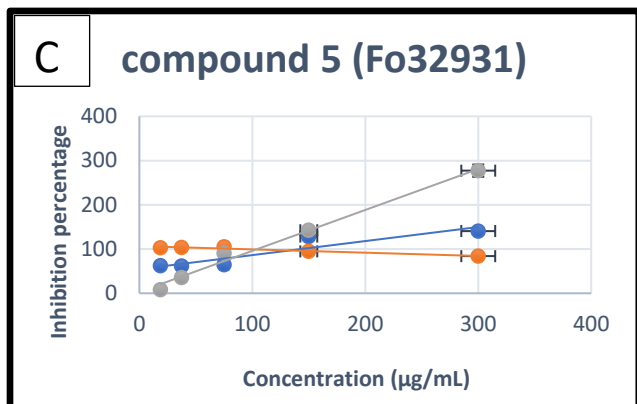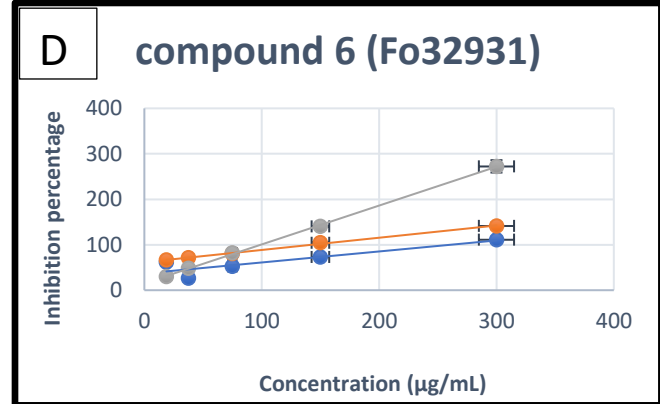

**Figure S4:** MIC of the most active natural compounds: stilbene-coumarin **1** (A) and (B); ellagic acid derivatives **5** and **6** (C) and (D) against *Fo32931* and *Fo4287*

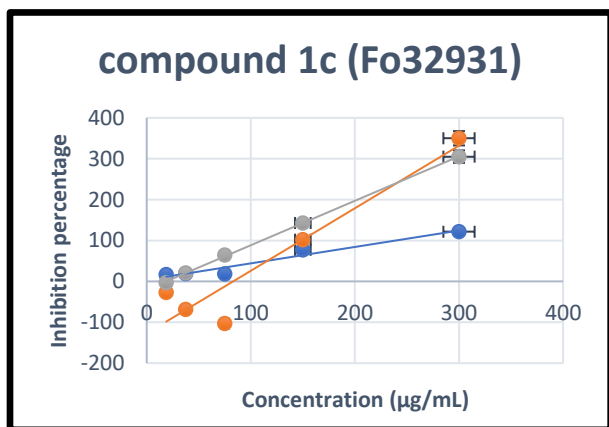

**Figure S5:** MIC of the most active semisynthetic compound **1c** against *Fo32931*

fragmentor voltage 130

|            |              |               |      |           |        |                |              |           |                     |      |     |
|------------|--------------|---------------|------|-----------|--------|----------------|--------------|-----------|---------------------|------|-----|
| Comment    | 130 V        | Count         | 3017 | Data Type | MS     | Date           | 2019-08-23   | File Name | D:\190823HRMS\AR1.d |      |     |
| Instrument | Instrument 1 | Ion Mode      | ESI+ | Plot Type | Stick  | Retention Time | 3.671        | Sample    | AR1                 | Scan | 156 |
| Scan Type  | Scan         | Spectrum Type | MS   | TIC       | 750.33 | Total Signal   | 2722279.1161 |           |                     |      |     |

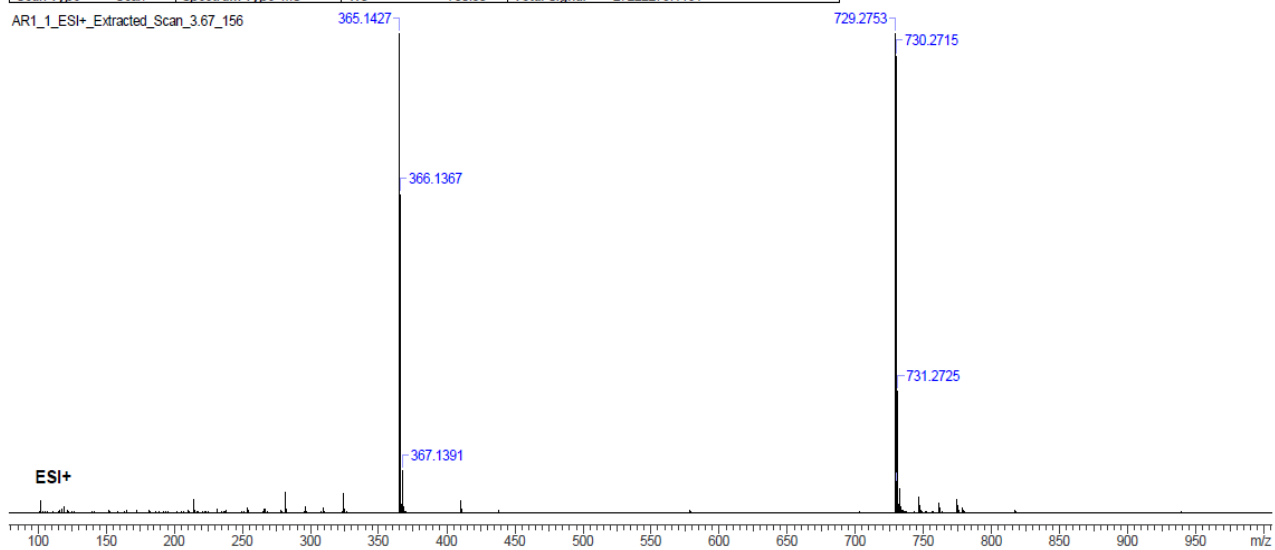

| Expected Mass (m/z) | Observed Mass (m/z) | Error (ppm) |
|---------------------|---------------------|-------------|
| 365.1389            | 365.1427            | 10.407      |

Figure S6: HRESIMS spectrum of compound 1a

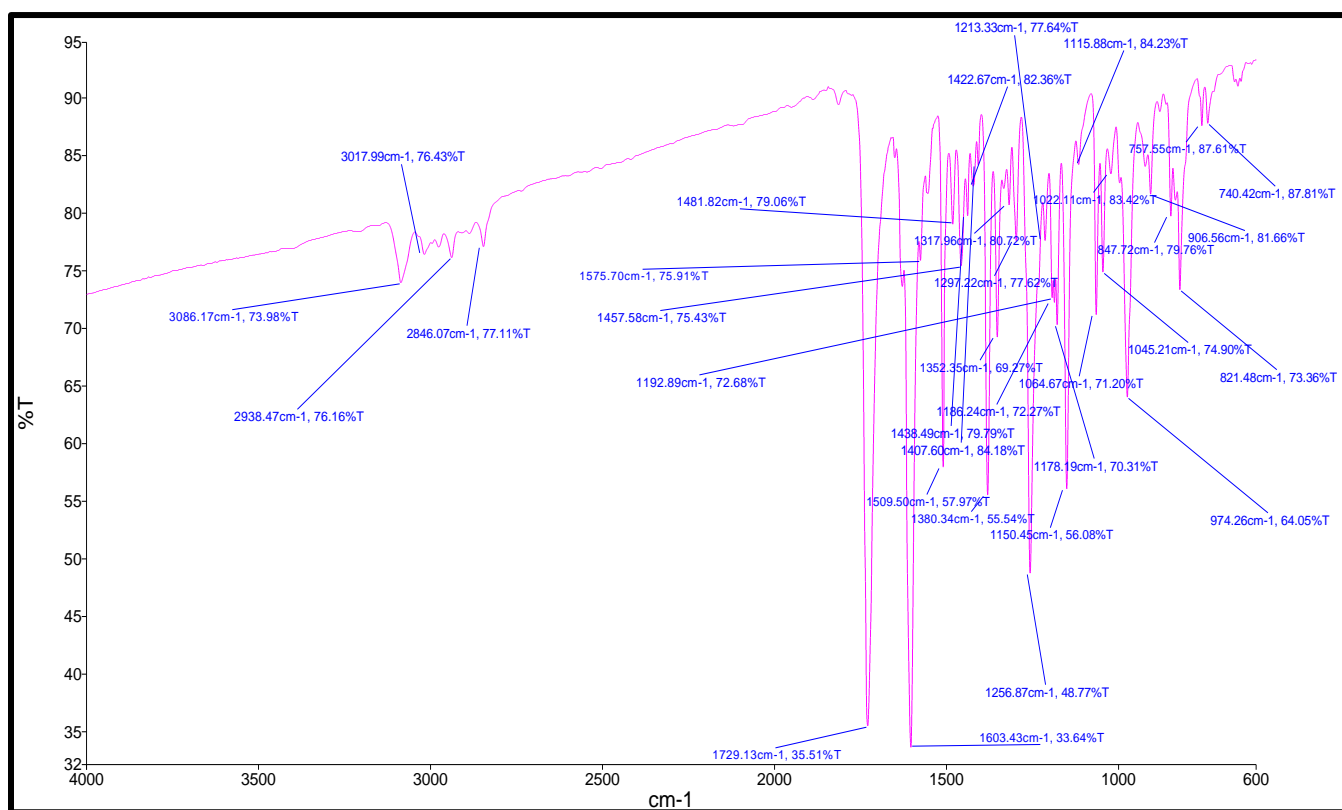

Figure S7: IR spectrum of compound 1a

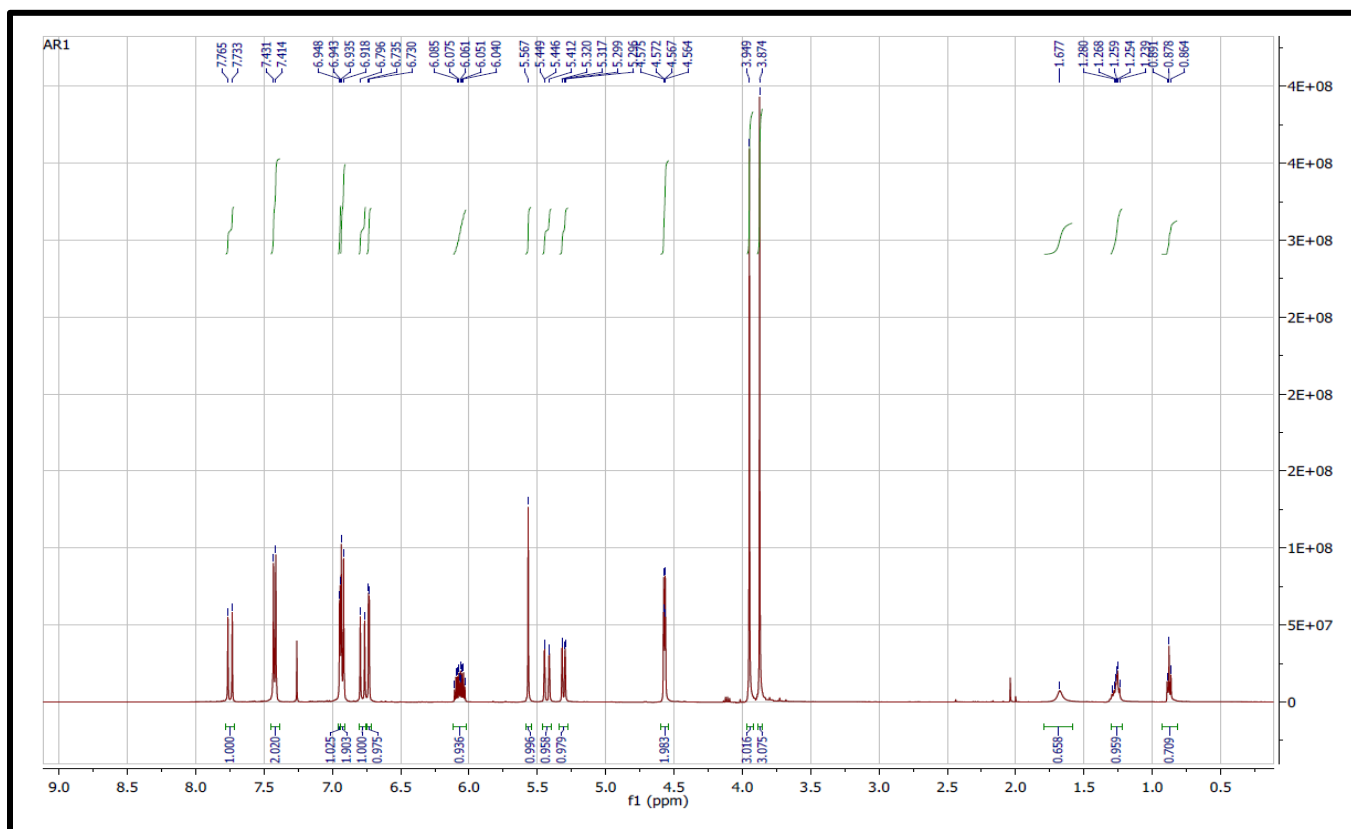

Figure S8:  $^1\text{H}$  NMR ( $\text{CDCl}_3$ , 500 MHz) spectrum of compound 1a

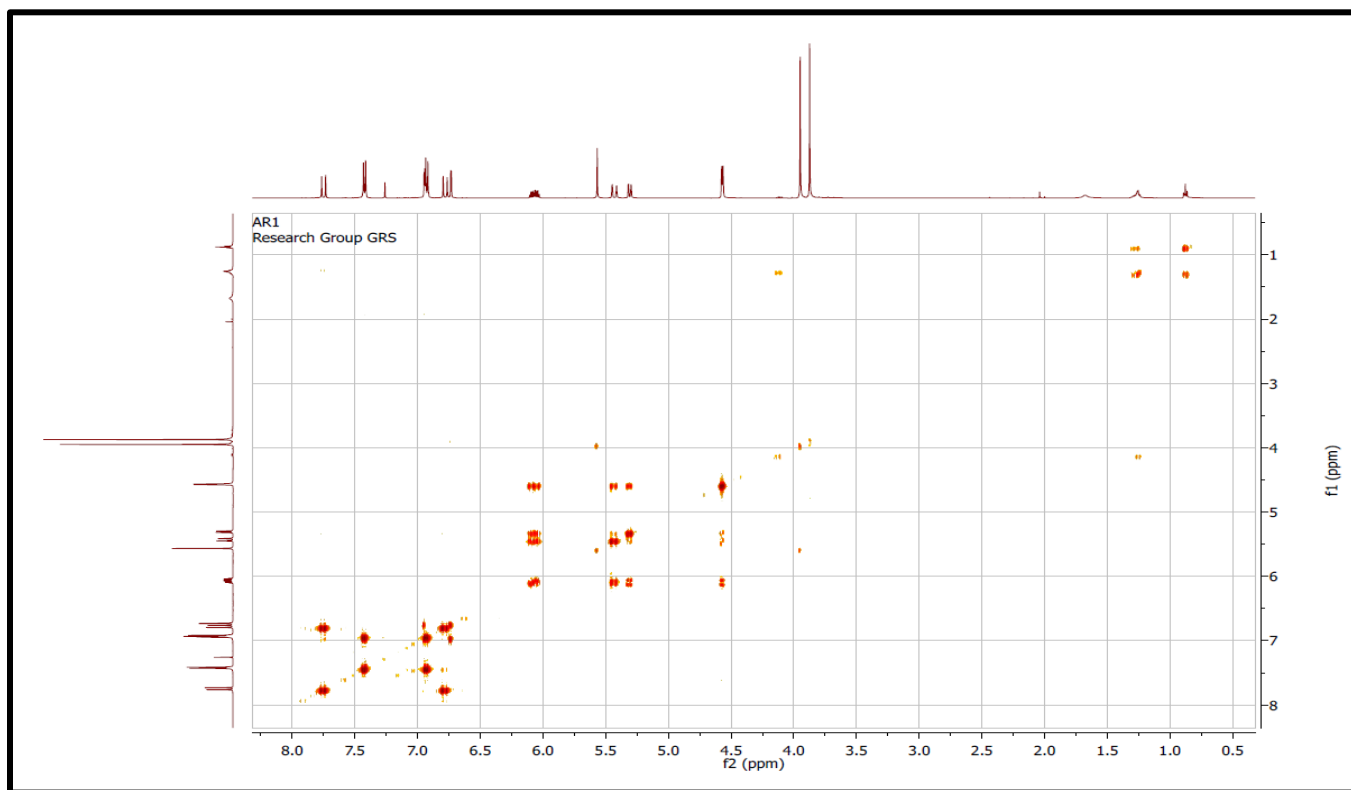

Figure S9: COSY spectrum of compound 1a

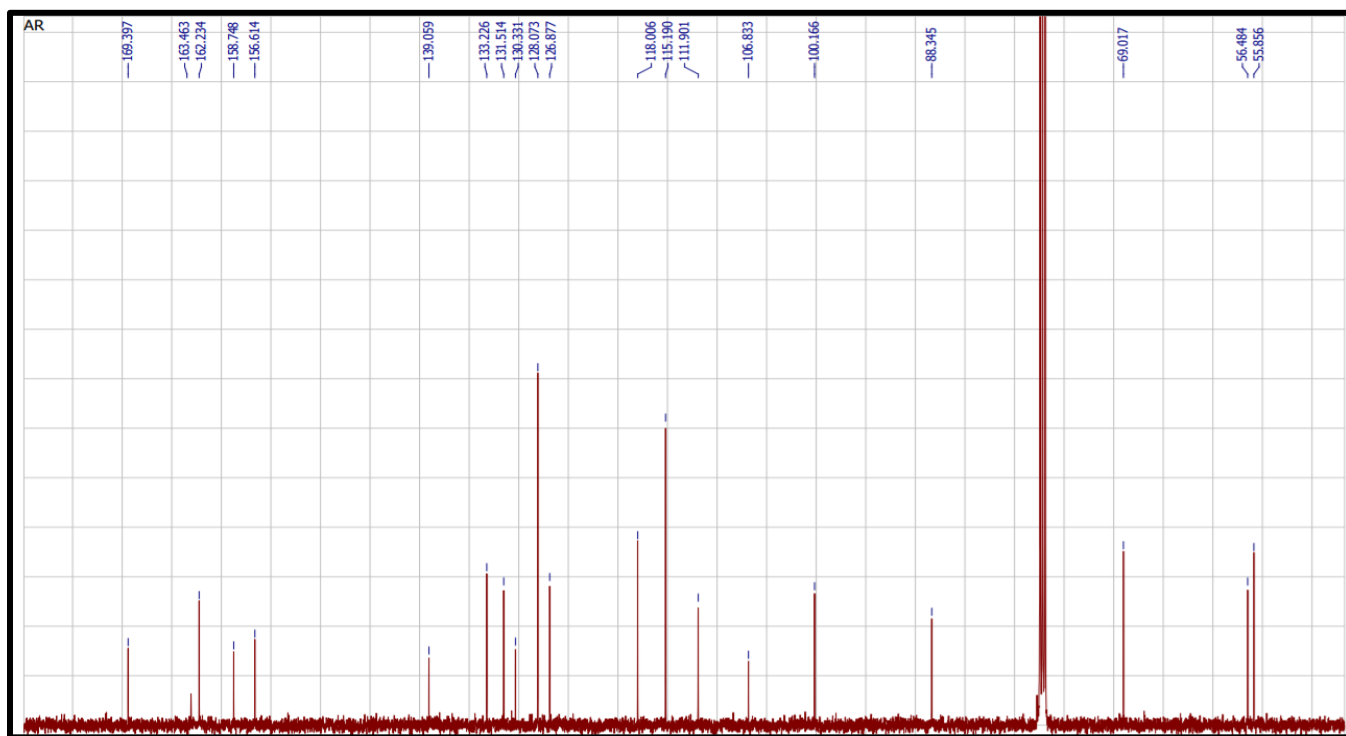

Figure S10:  $^{13}\text{C}$  NMR spectrum ( $\text{CDCl}_3$ , 125 MHz) of compound **1a**

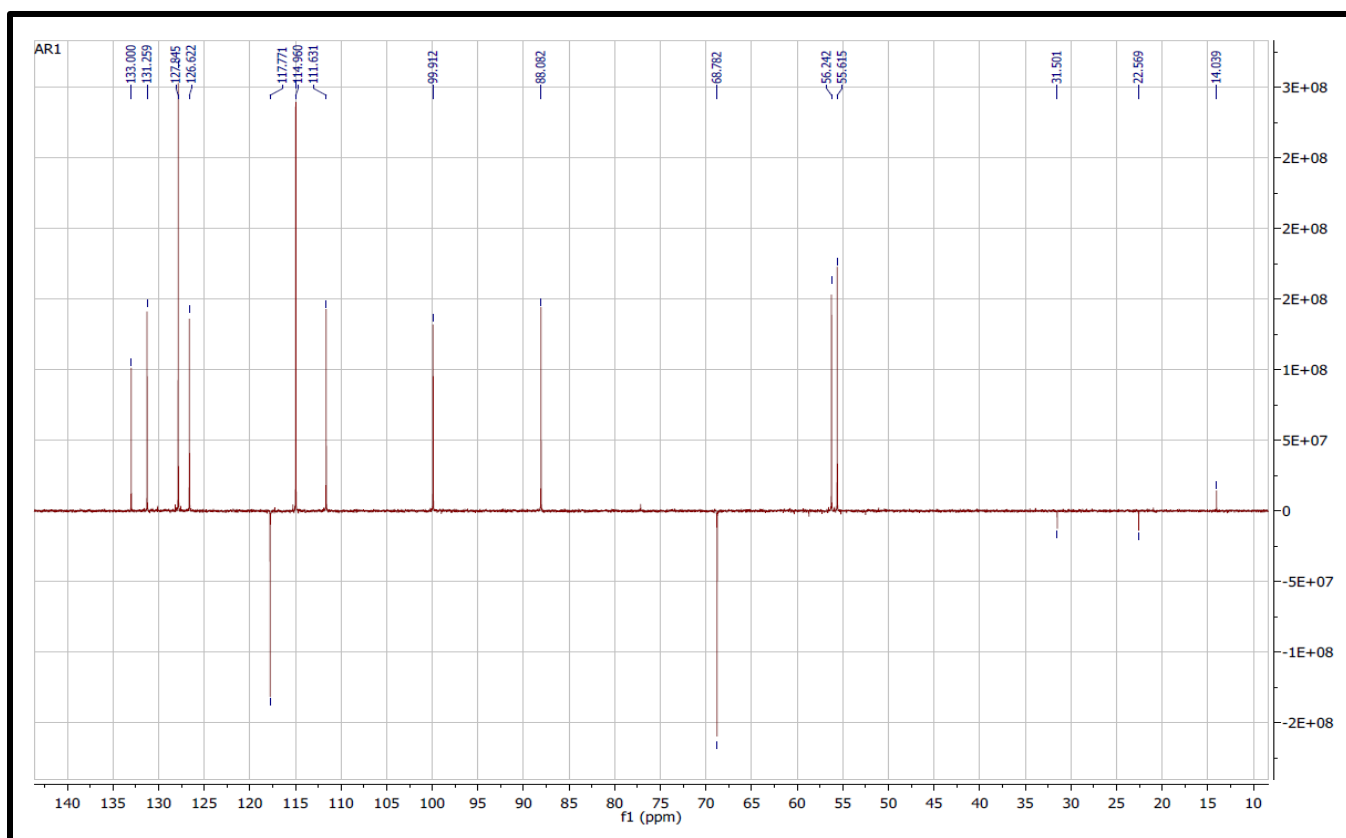

Figure S11: DEPT 135 spectrum of compound **1a**



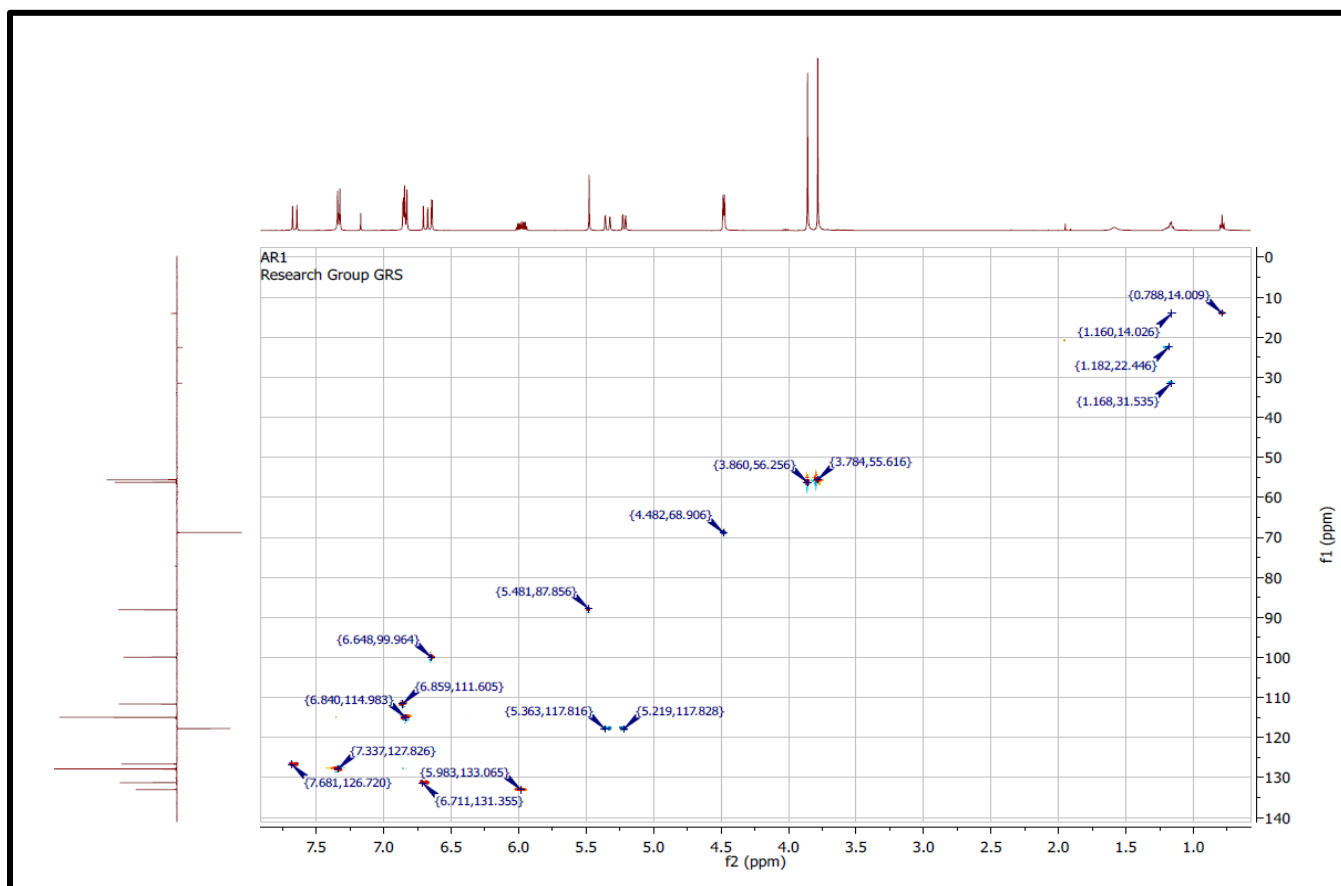

Figure S12: HSQC spectrum of compound 1a

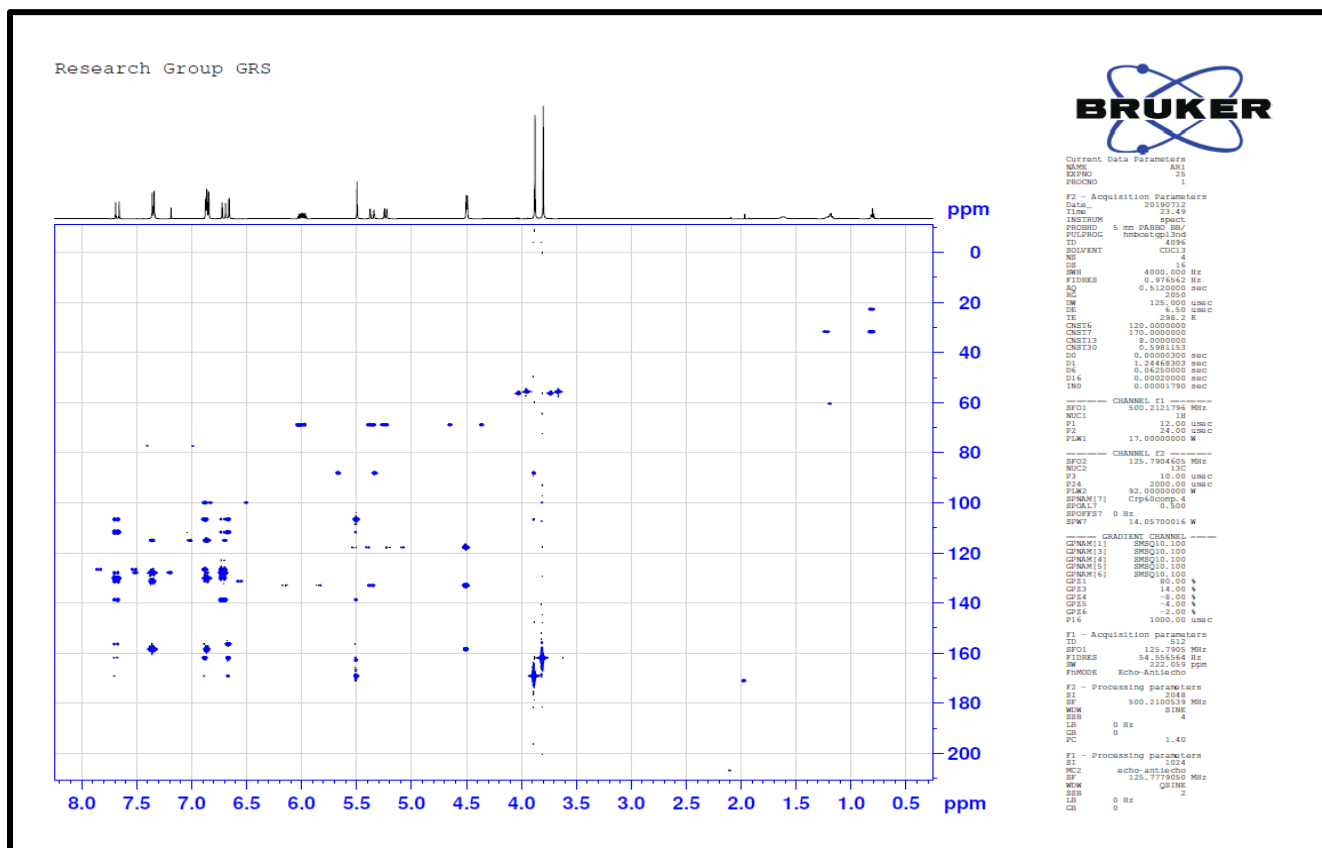

Figure S13: HMBC spectrum of compound 1a

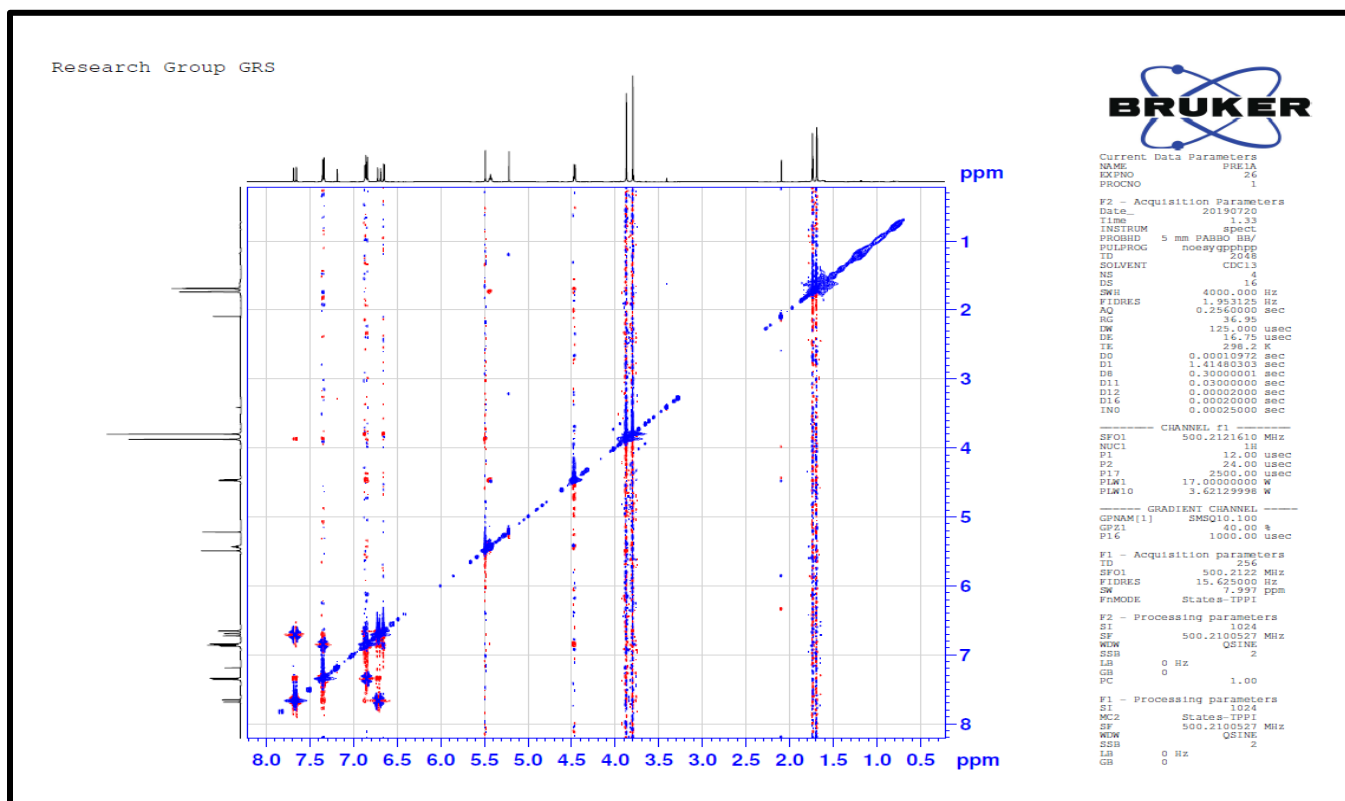

Figure S14: ROESY spectrum of compound 1a

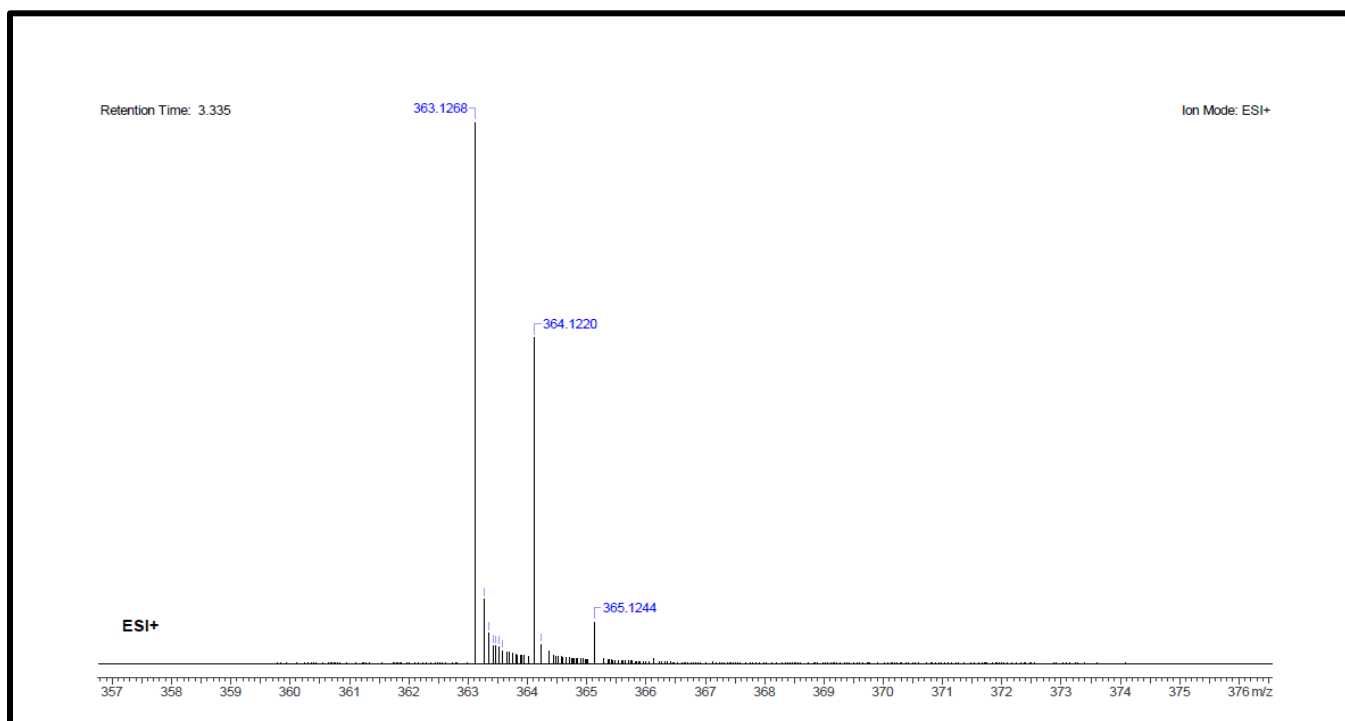

Figure S15: HRESIMS spectrum of compound 1b

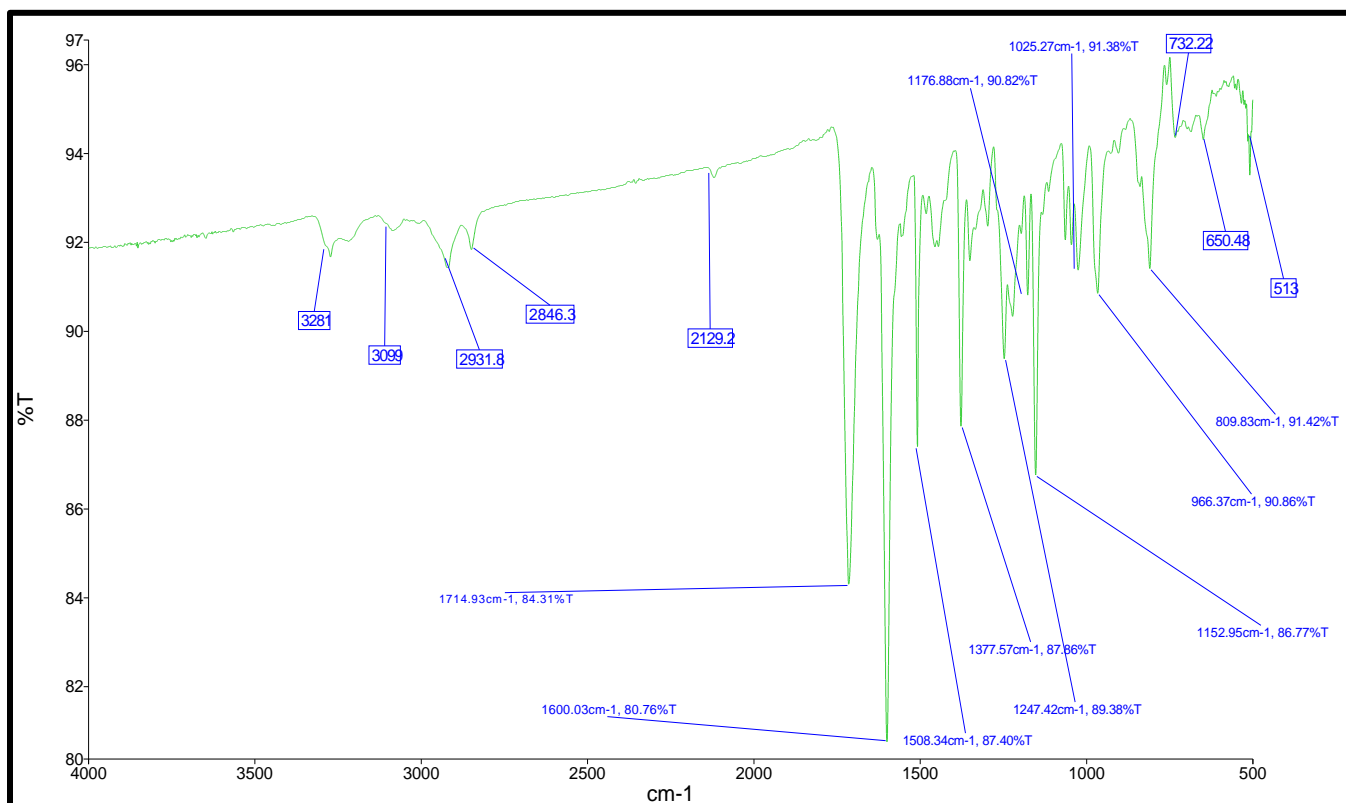

Figure S16: IR spectrum of compound 1b

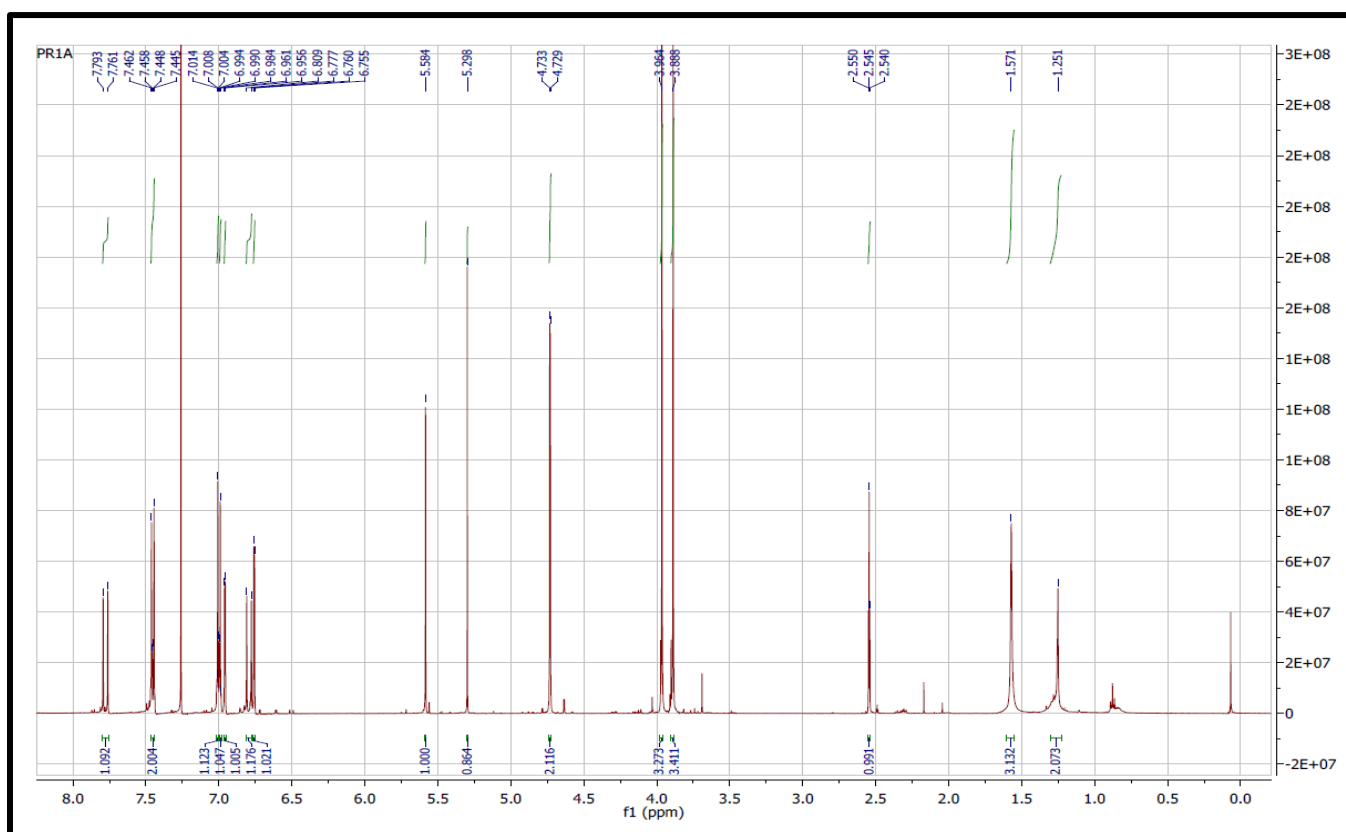

Figure S17: <sup>1</sup>H NMR spectrum (CDCl<sub>3</sub>, 500 MHz) of compound 1b

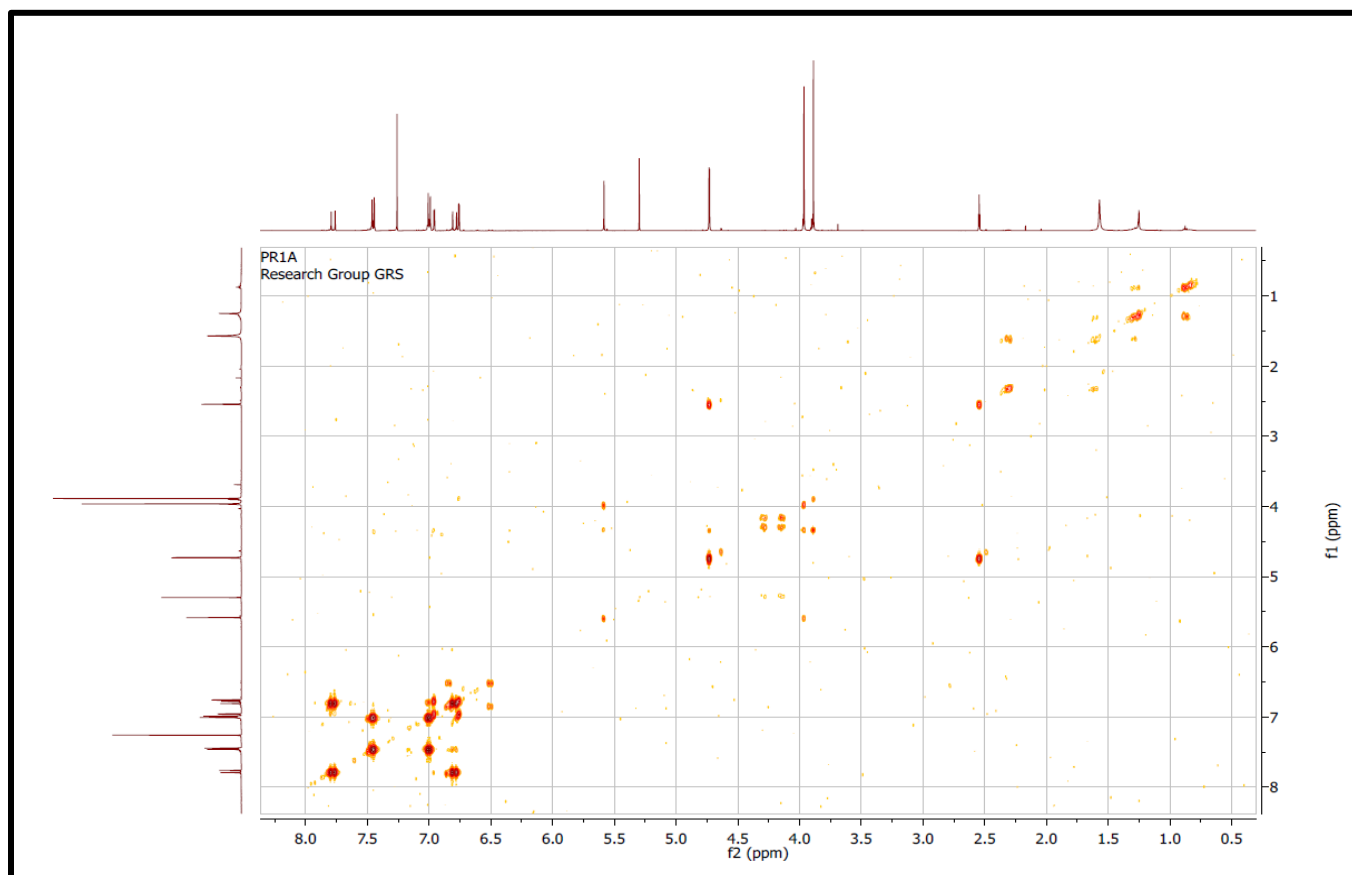

Figure S18: COSY spectrum of compound **1b**

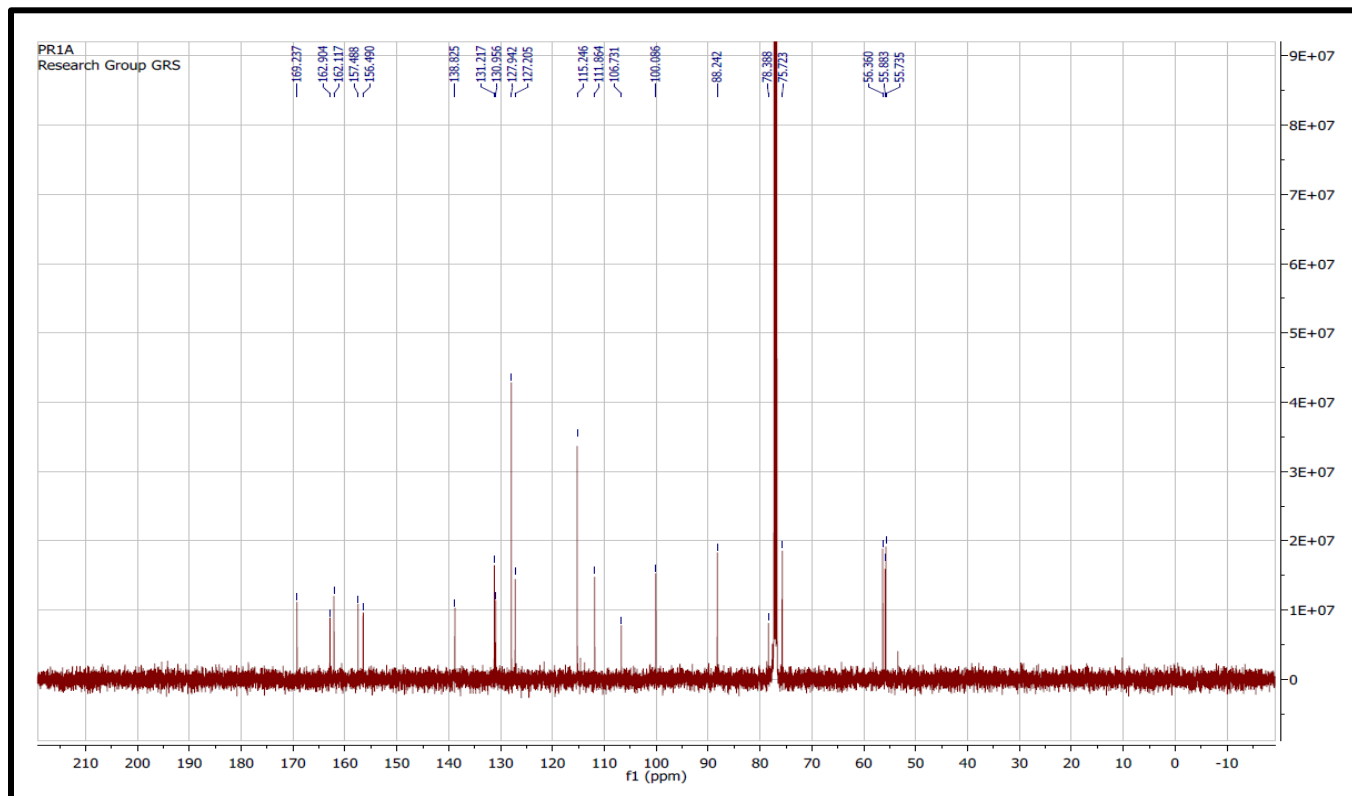

Figure S19:  $^{13}\text{C}$  NMR spectrum ( $\text{CDCl}_3$ , 125 MHz) of compound **1b**

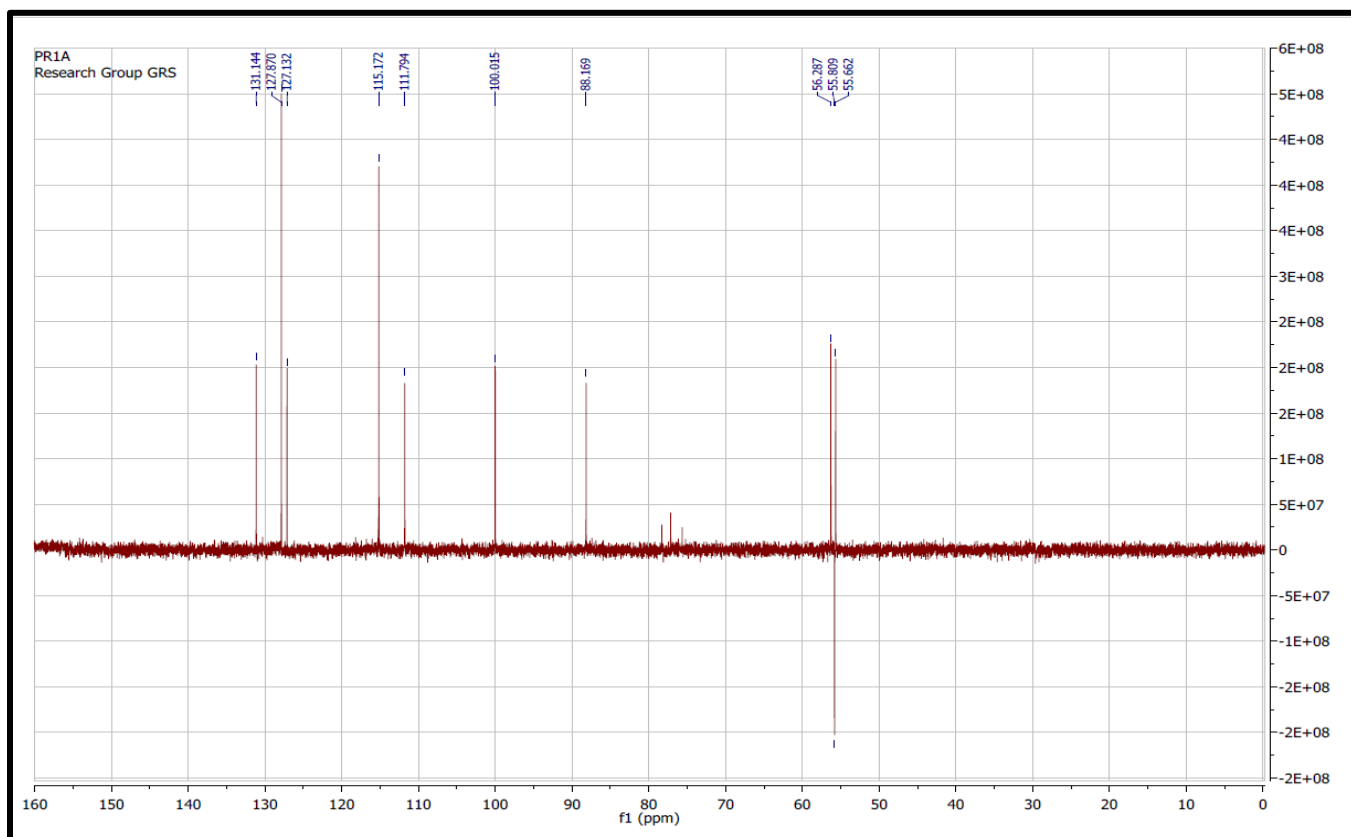

Figure S20: DEPT 135 spectrum of compound **1b**

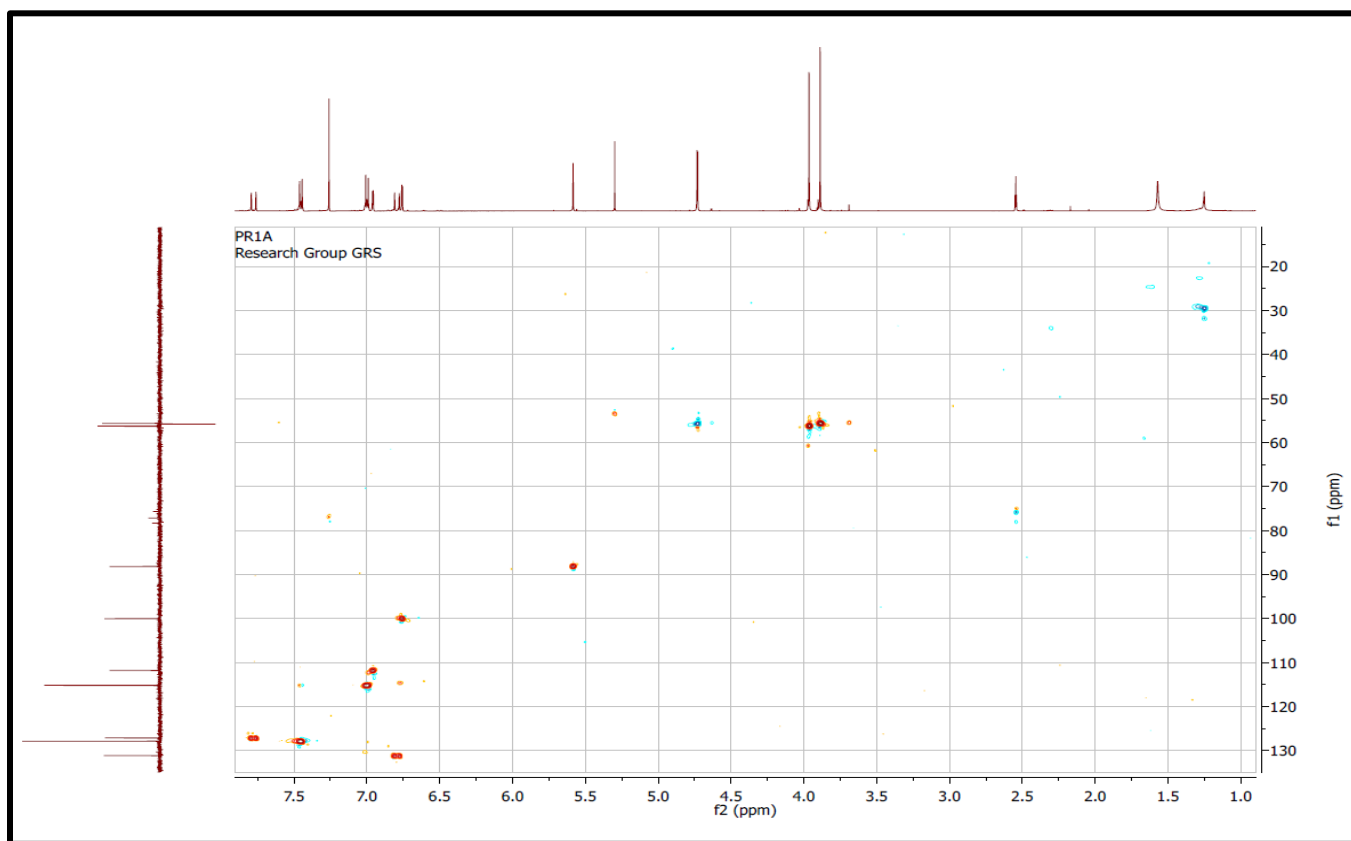

Figure S21: HSQC spectrum of compound **1b**

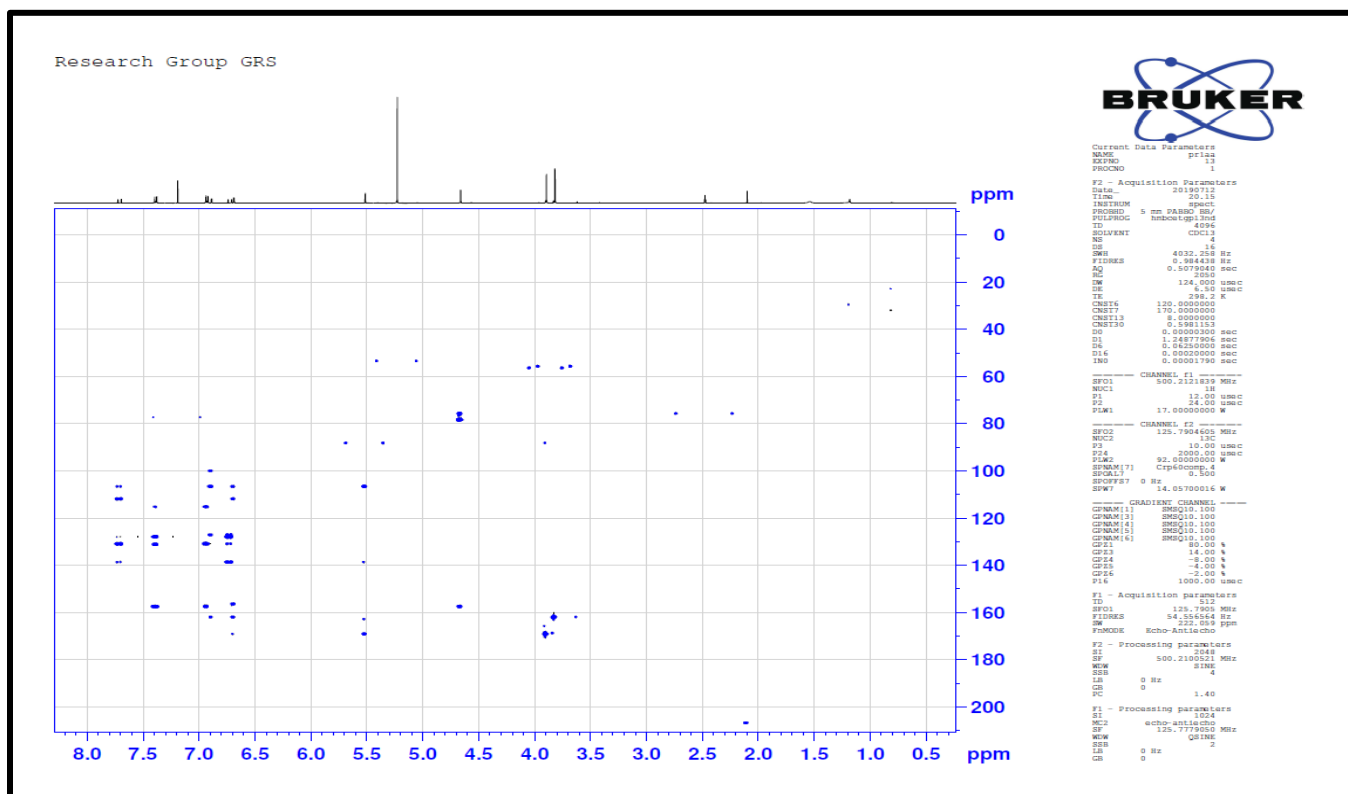

Figure S22: HMBC spectrum of compound **1b**

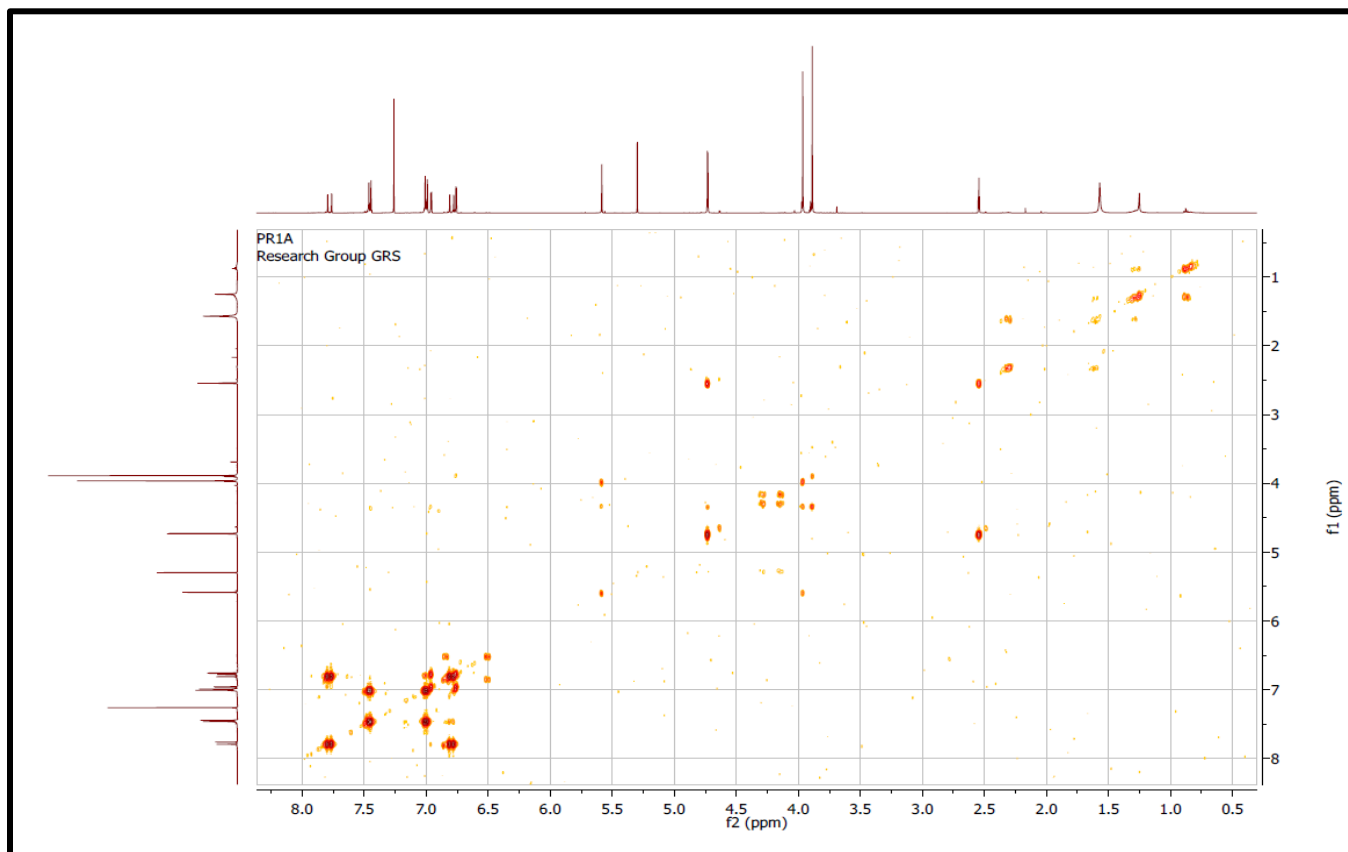

Figure S23: NOESY spectrum of compound **1b**

fragmentor voltage 130

|            |              |               |      |           |        |                |               |           |                     |
|------------|--------------|---------------|------|-----------|--------|----------------|---------------|-----------|---------------------|
| Comment    | 130 V        | Count         | 2483 | Data Type | MS     | Date           | 2019-08-23    | File Name | D:\190823HRMSPRE1.d |
| Instrument | Instrument 1 | Ion Mode      | ESI+ | Plot Type | Stick  | Retention Time | 3.985         | Sample    | PRE1                |
| Scan Type  | Scan         | Spectrum Type | MS   | TIC       | 609.22 | Total Signal   | 22093927 9365 | Scan      | 169                 |

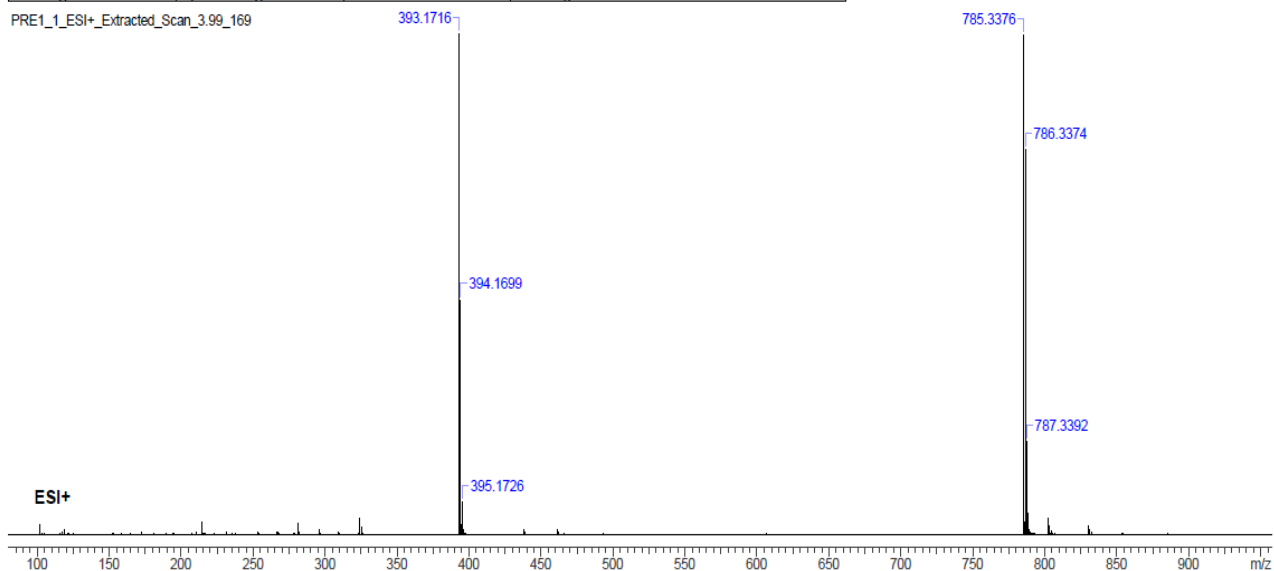

| Expected Mass ( <i>m/z</i> ) | Observed Mass ( <i>m/z</i> ) | (Error (ppm)) |
|------------------------------|------------------------------|---------------|
| 393.1702                     | 393.1716                     | 3.560799      |

Figure S24: HRESIMS spectrum of compound **1c**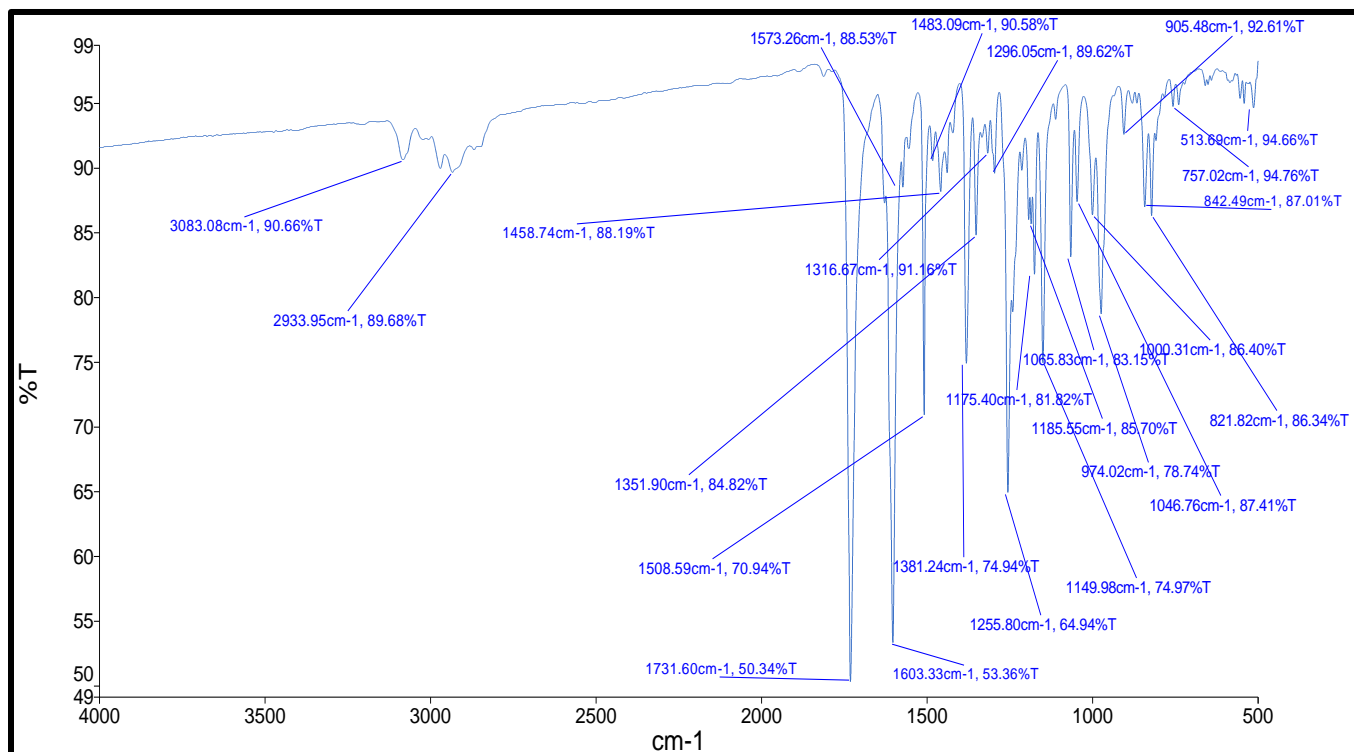Figure S25: IR spectrum of compound **1c**

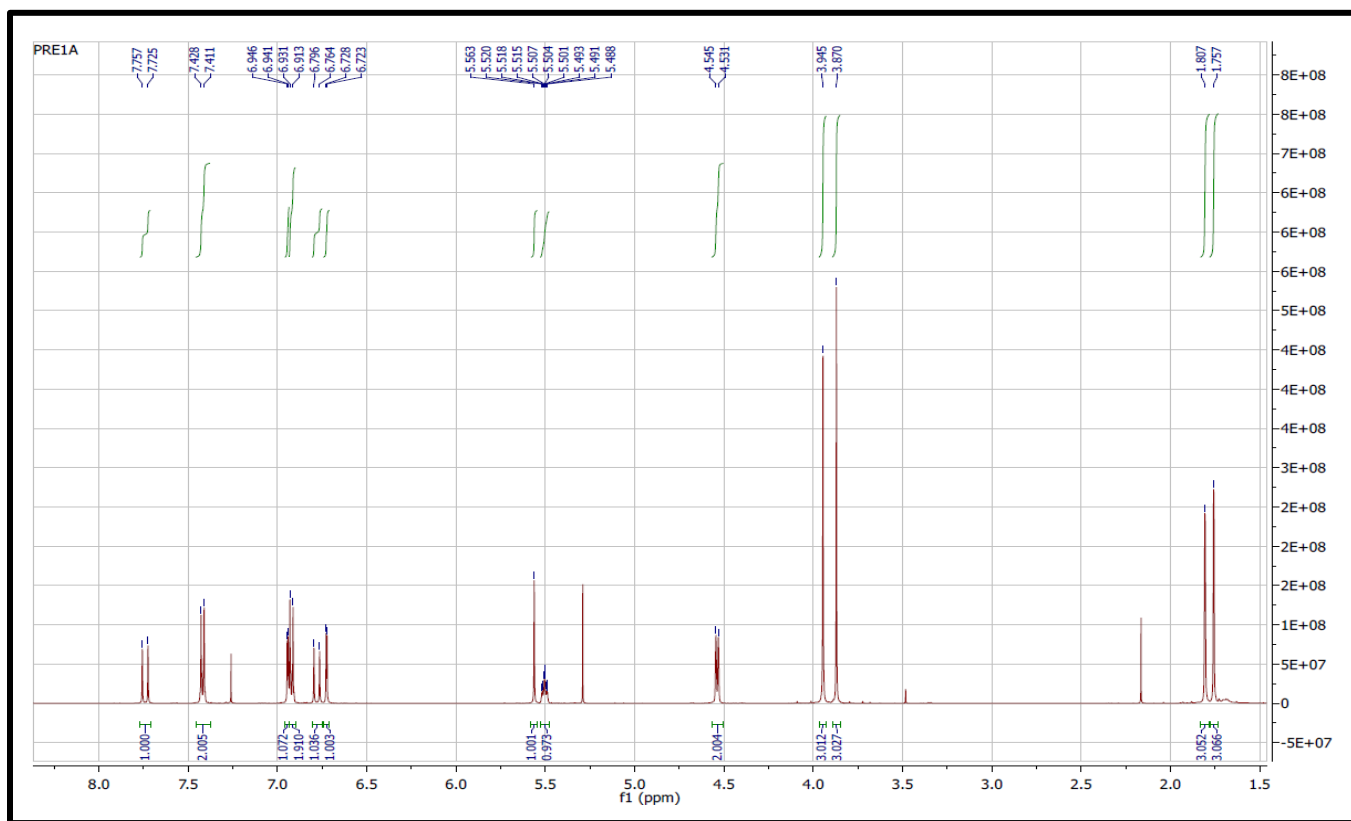

Figure S26:  $^1\text{H}$  NMR spectrum ( $\text{CDCl}_3$ , 500 MHz) of compound **1c**

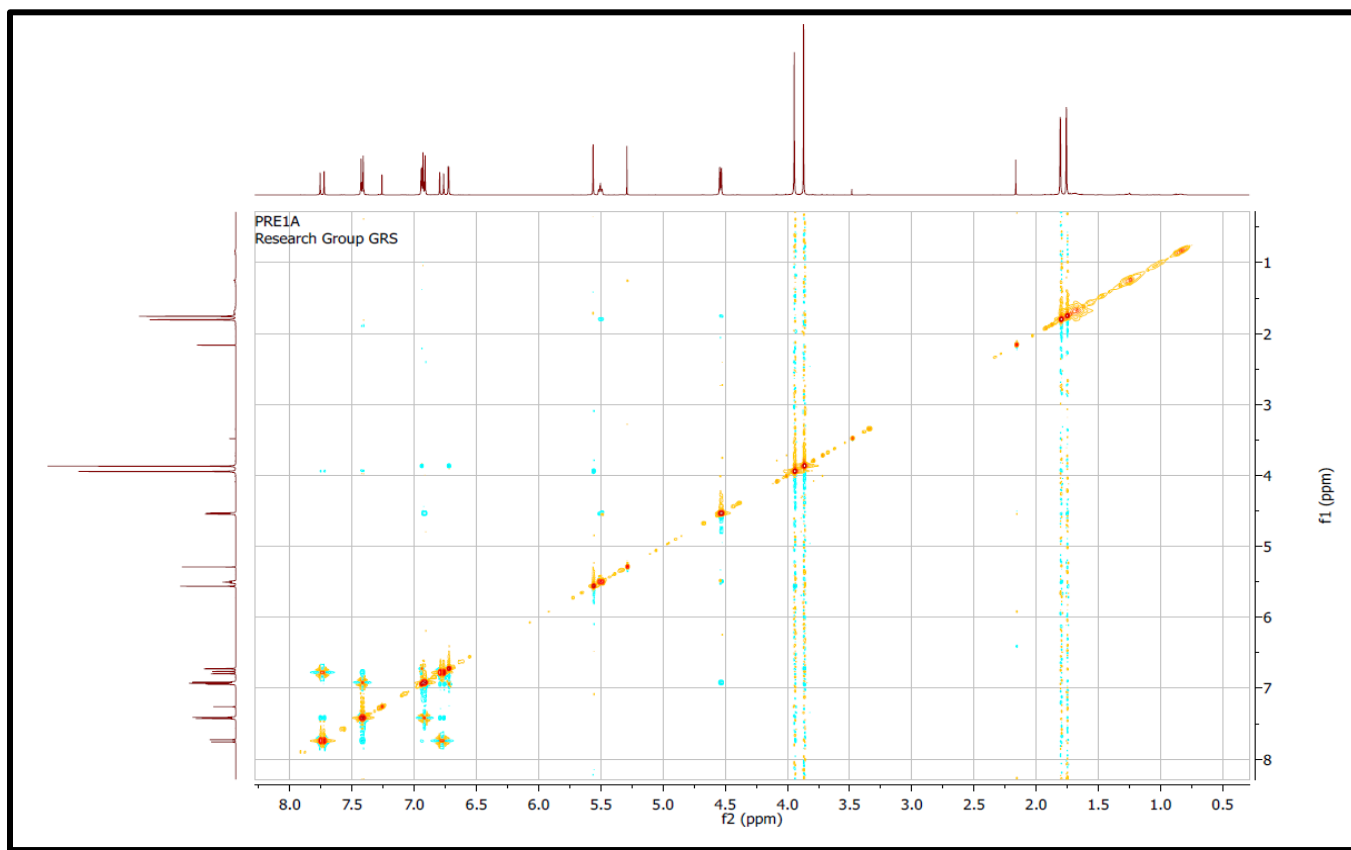

Figure S27: COSY spectrum of compound **1c**



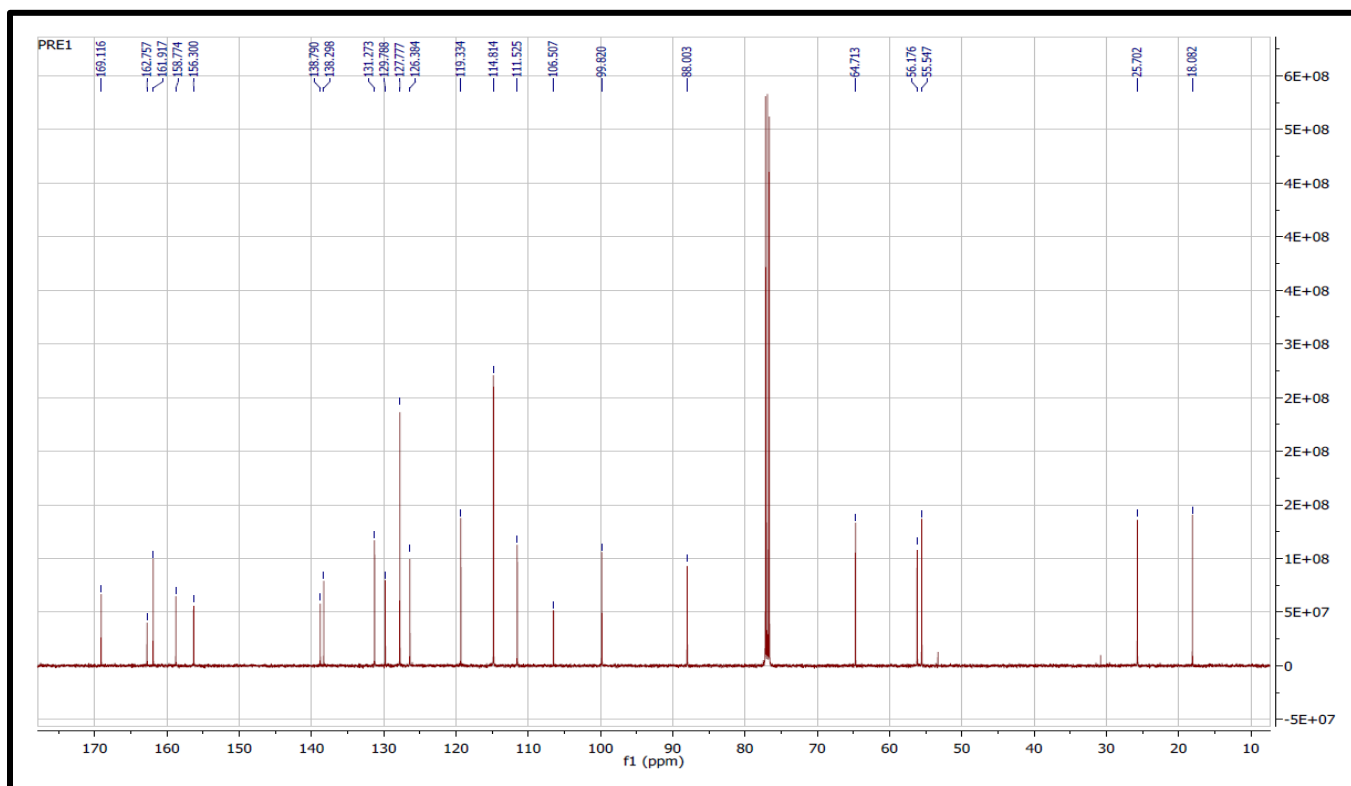

Figure S28:  $^{13}\text{C}$  NMR spectrum ( $\text{CDCl}_3$ , 125 MHz) of compound **1c**

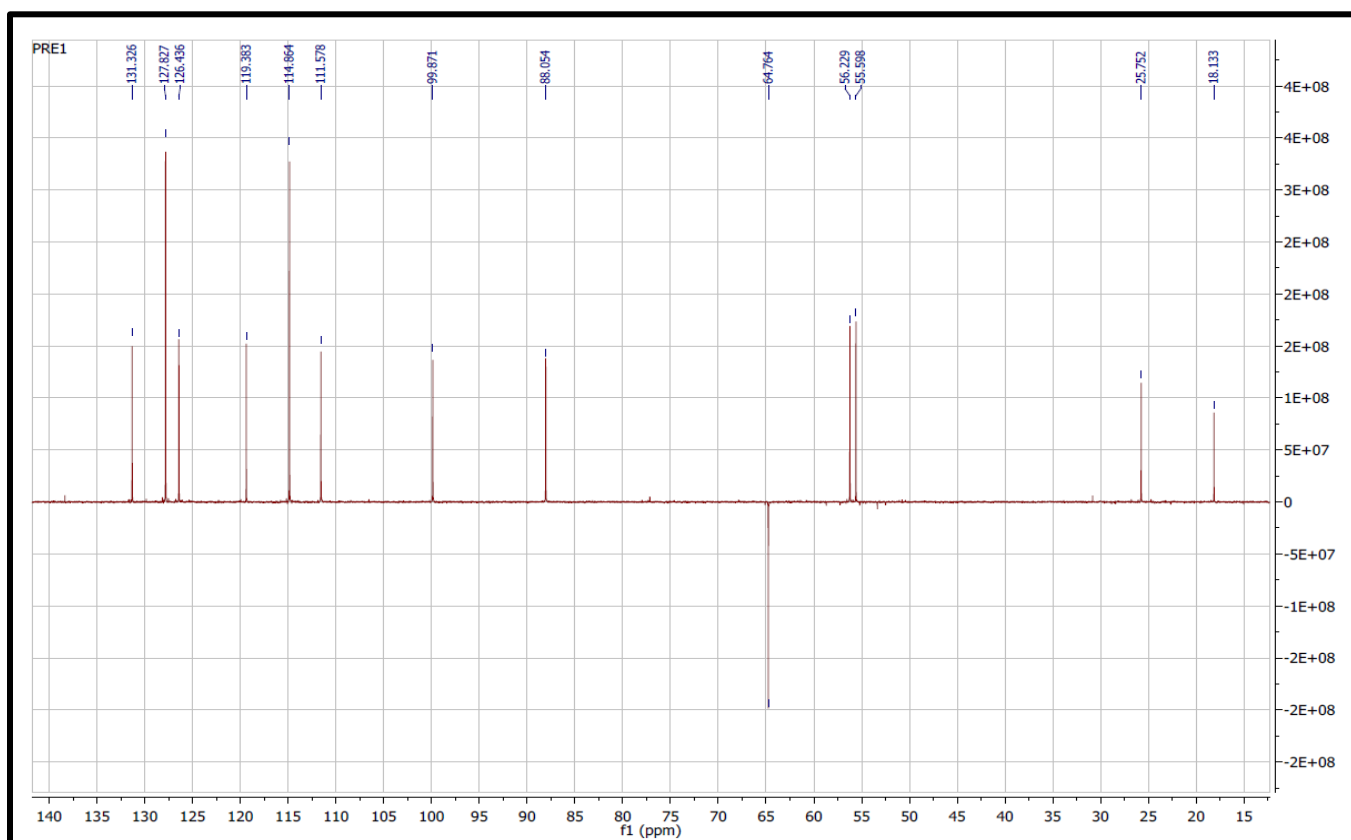

Figure S29: DEPT 135 spectrum of compound **1c**

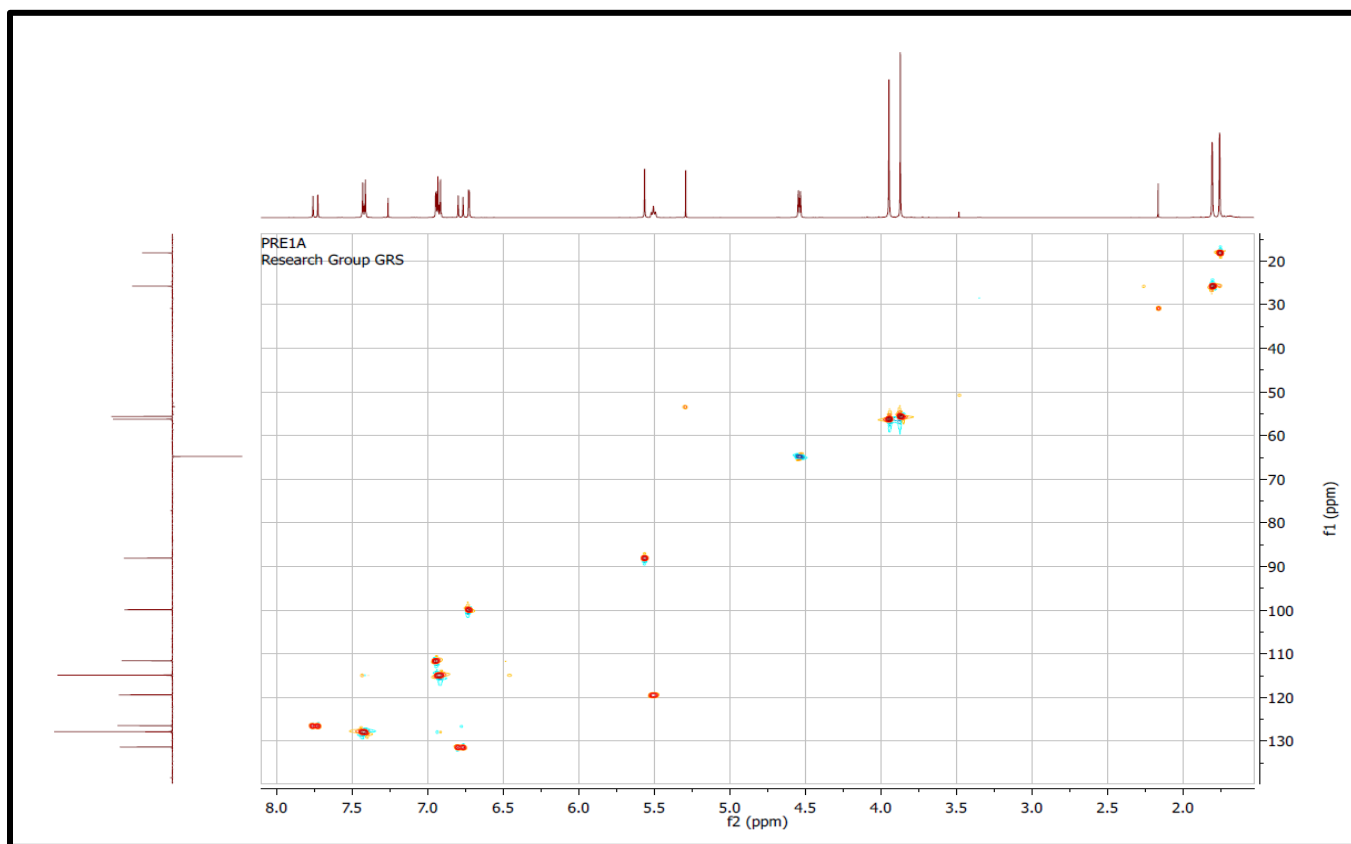

Figure S30: HSQC spectrum of compound **1c**

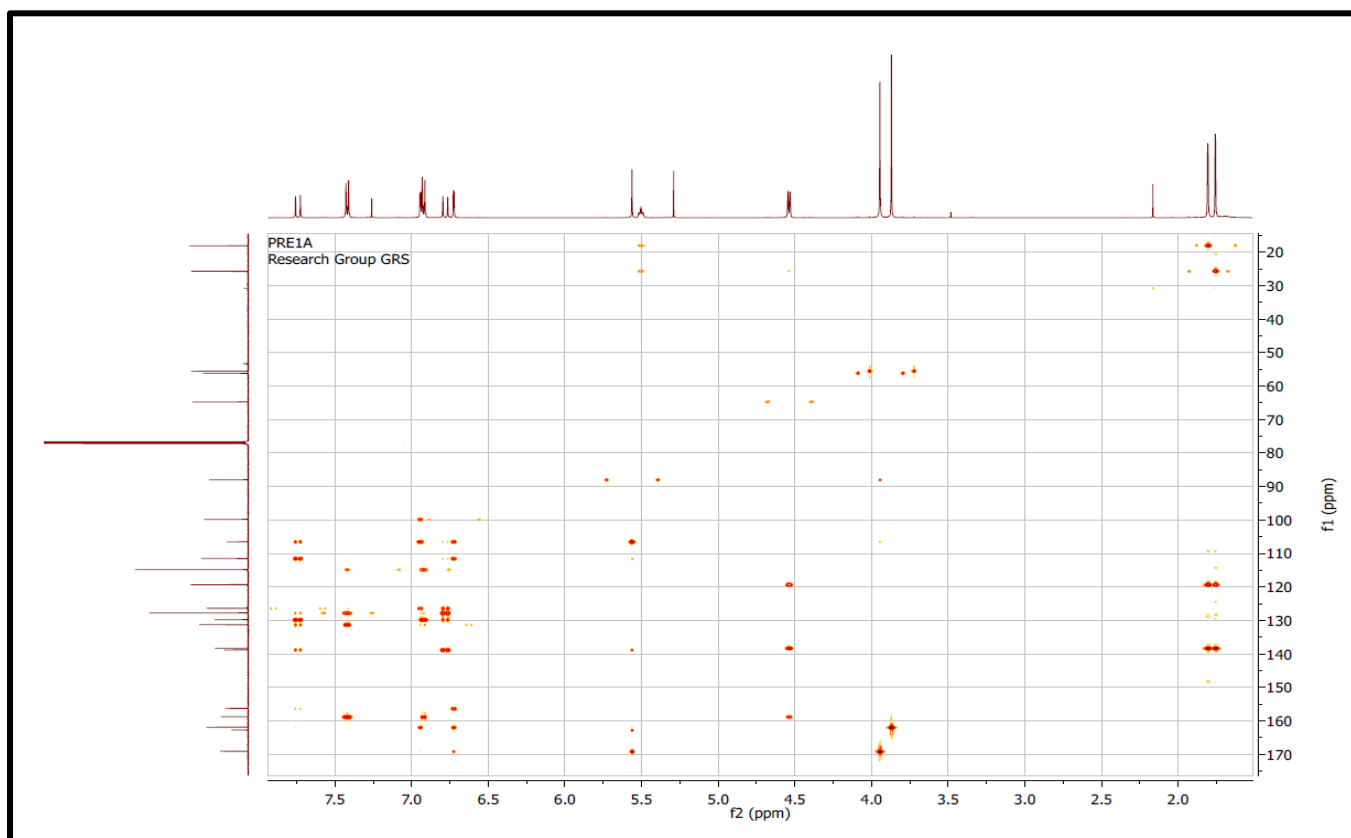

Figure S31: HMBC spectrum of compound **1c**

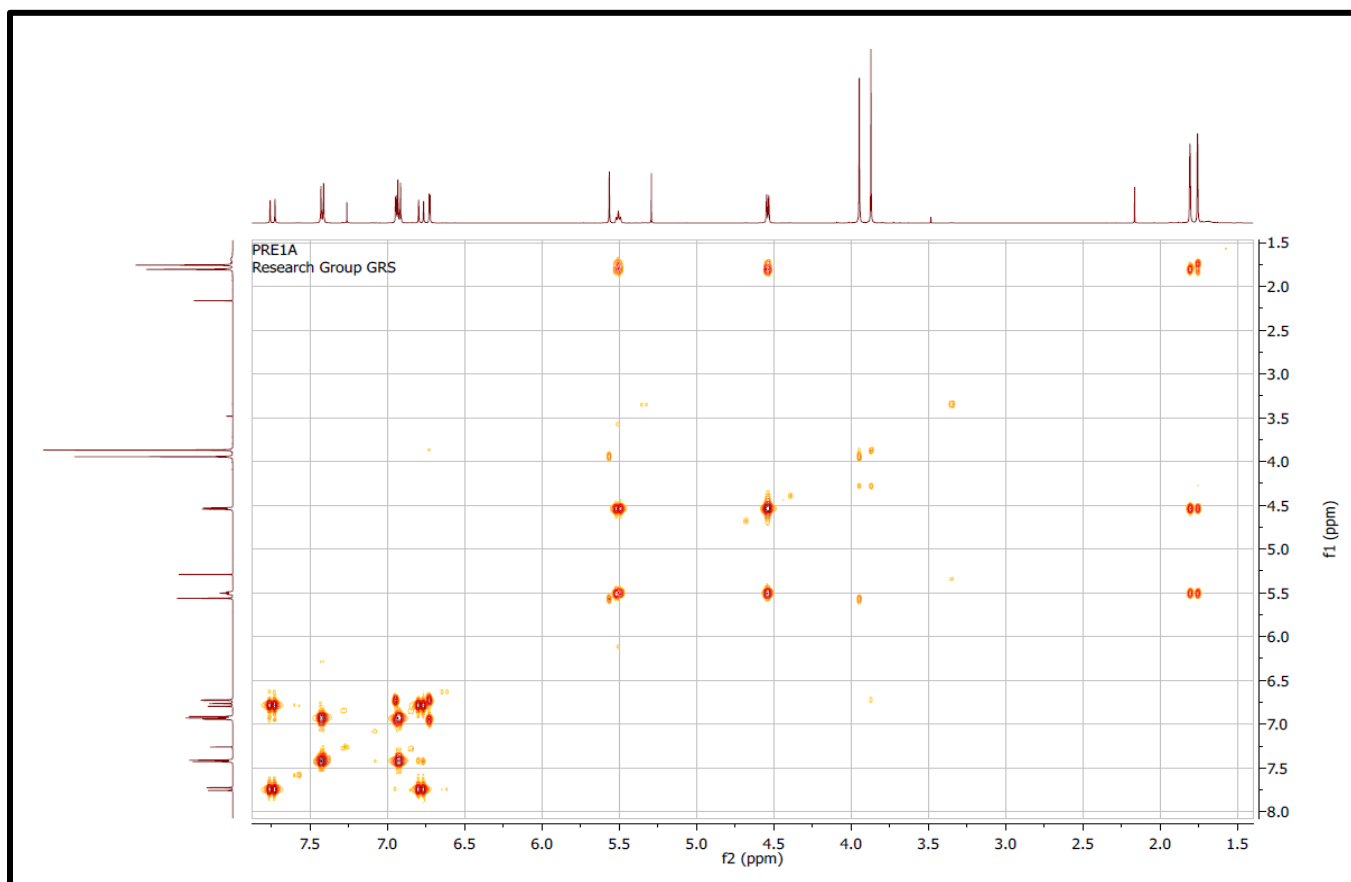

Figure S32: NOESY spectrum of compound 1c

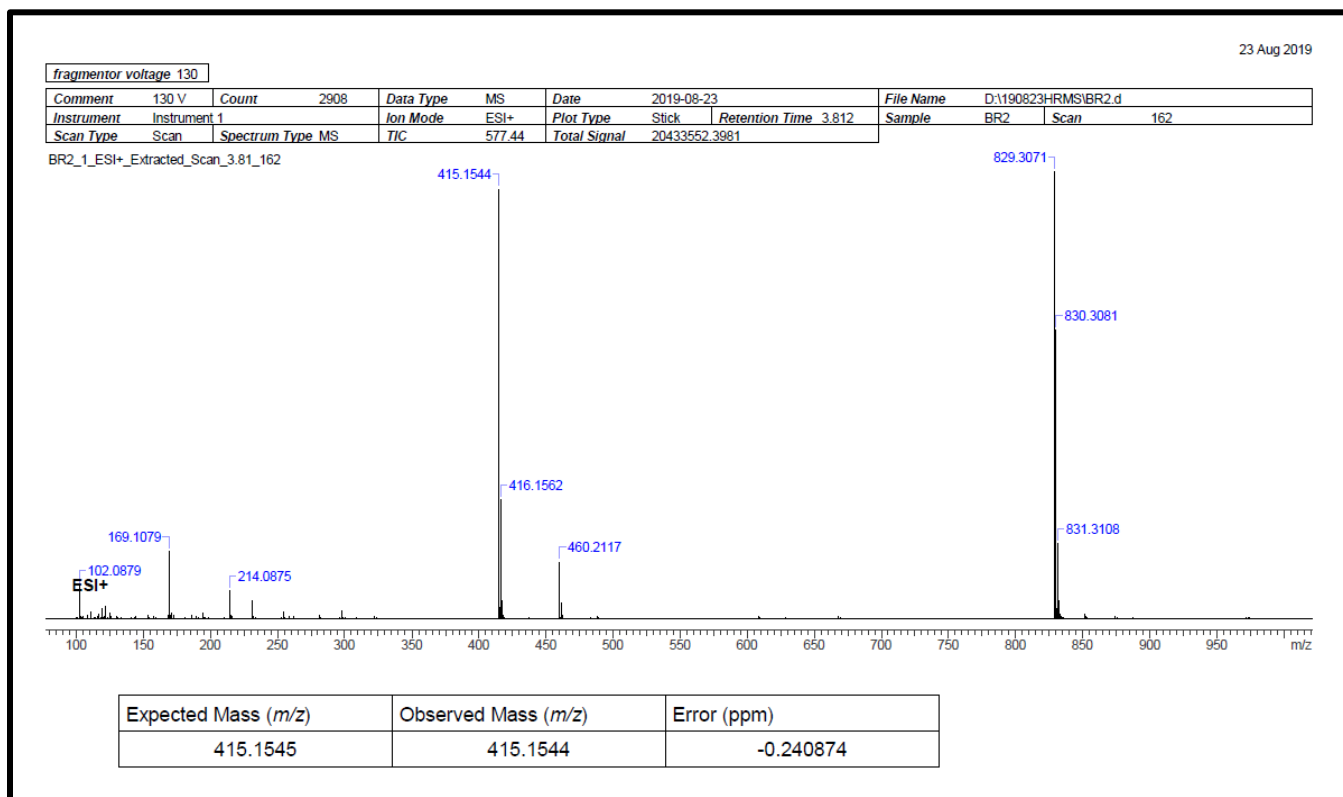

Figure S33: HRESIMS spectrum of compound 1d

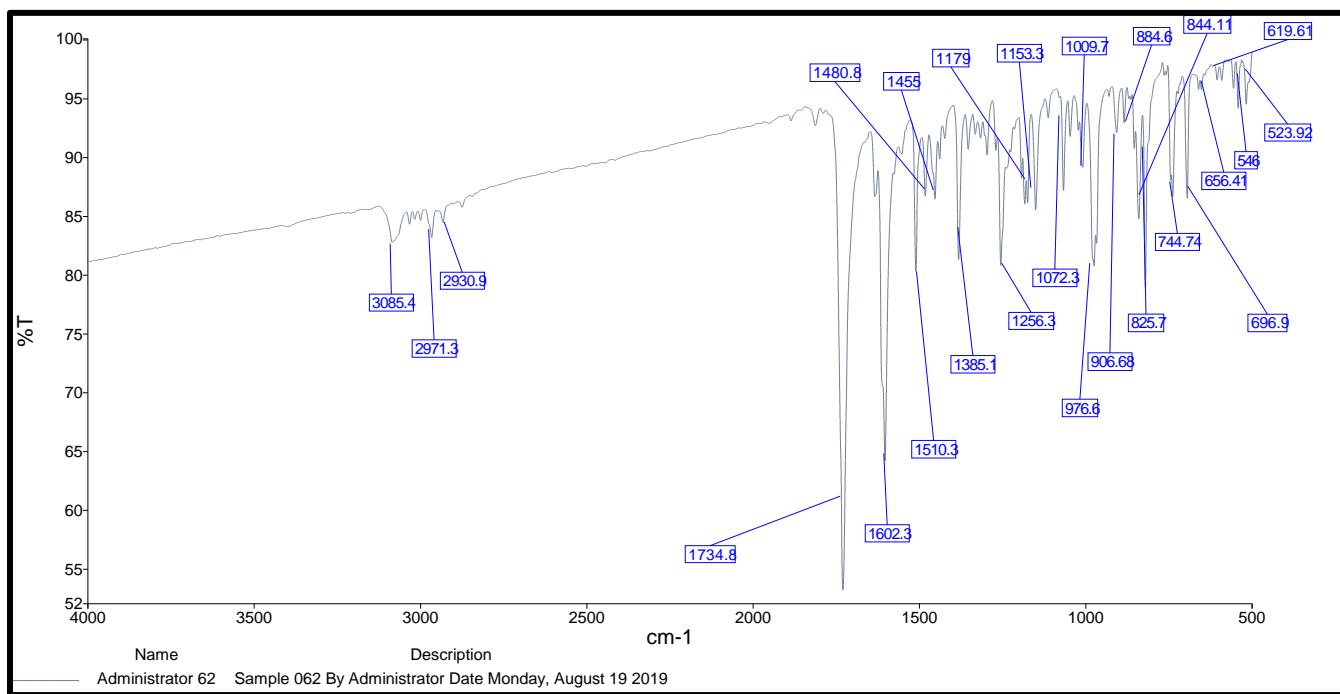

Figure S34: IR spectrum of compound 1d

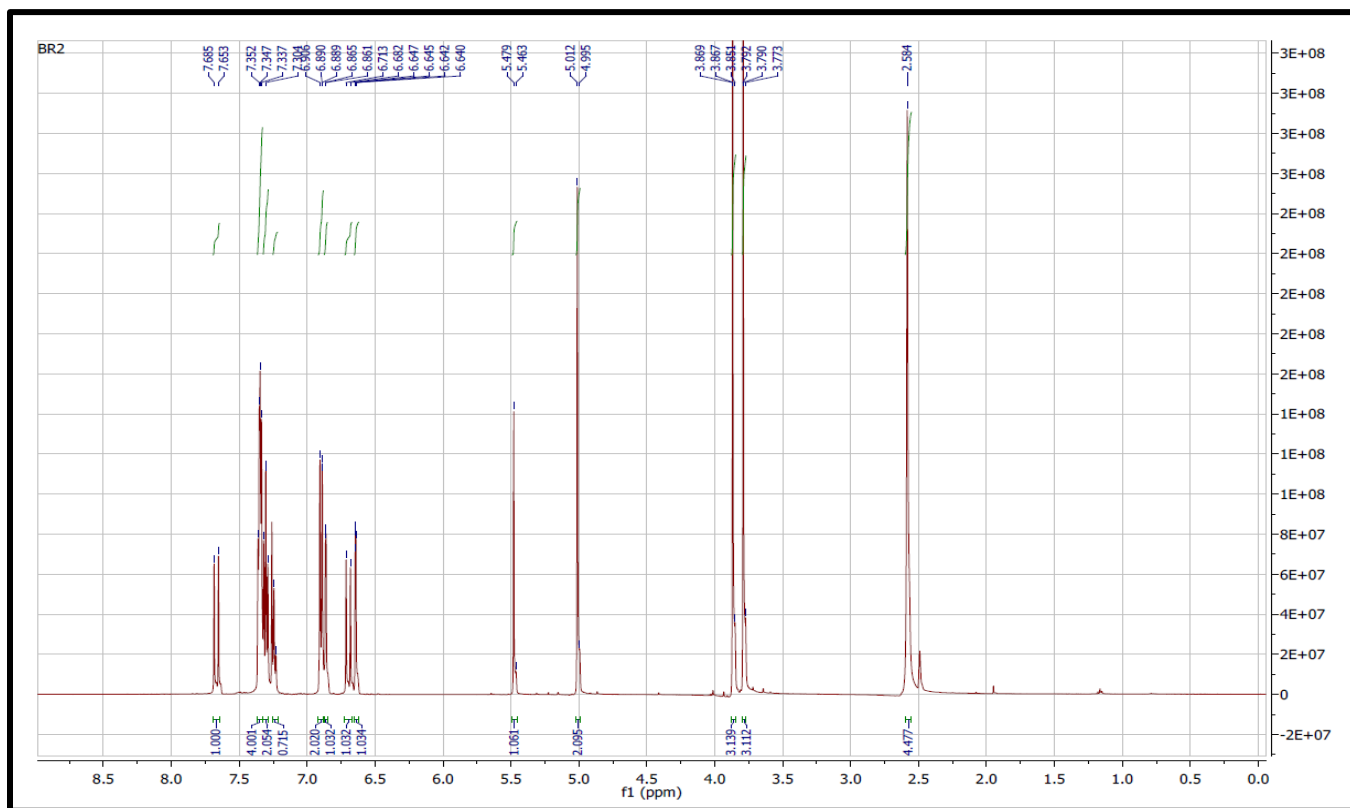

Figure S35: <sup>1</sup>H NMR spectrum (CDCl<sub>3</sub>, 500 MHz) of compound 1d

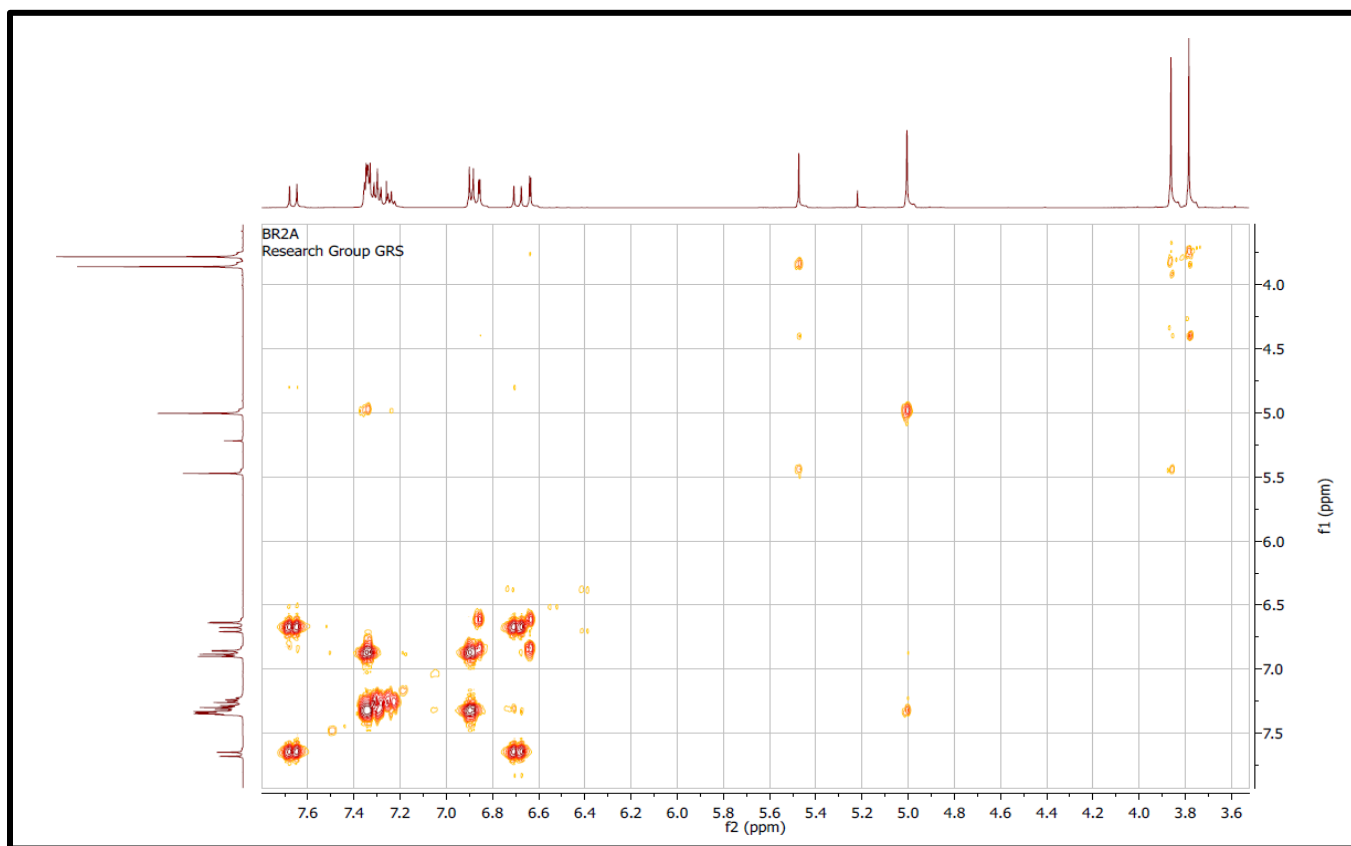

Figure S36: COSY spectrum of compound **1d**

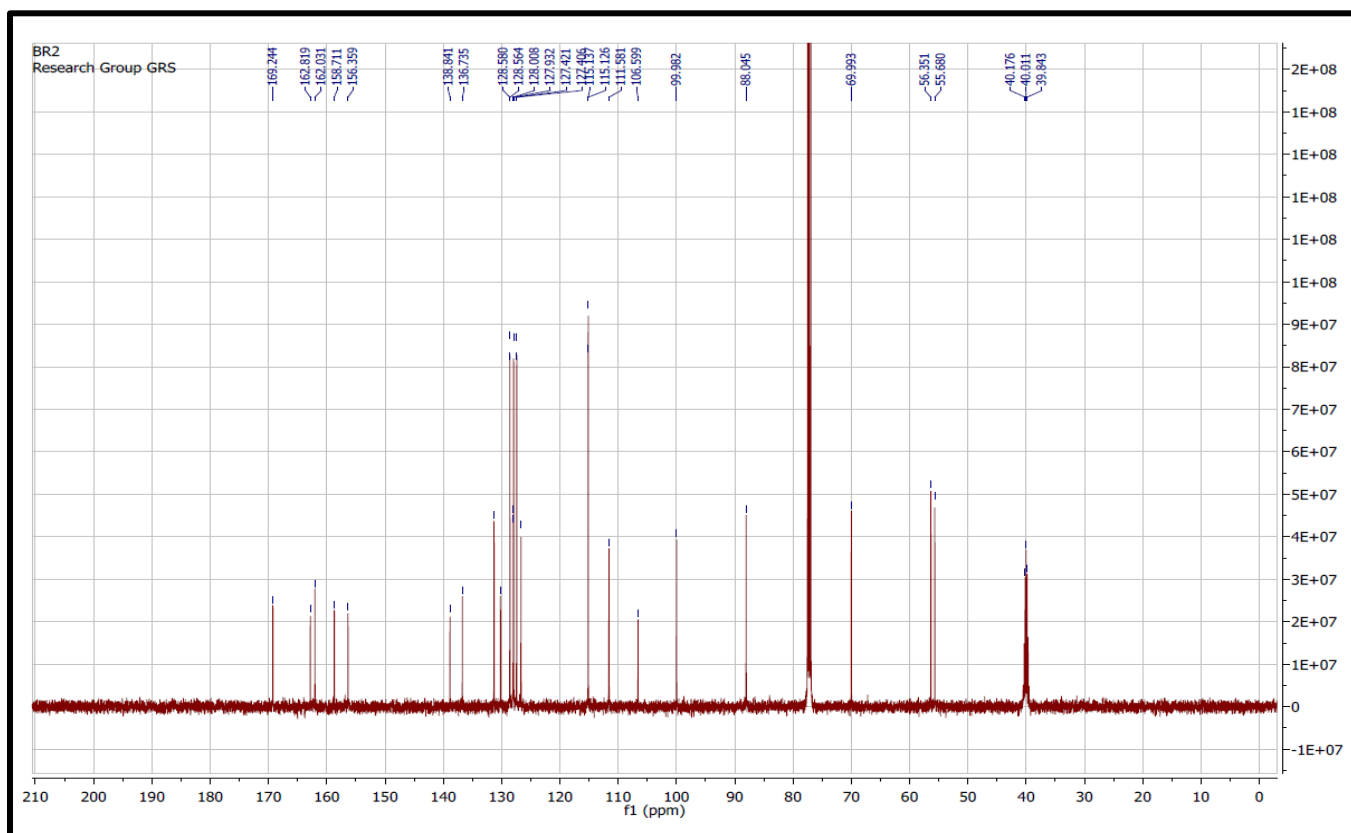

Figure S37:  $^{13}\text{C}$  NMR spectrum ( $\text{CDCl}_3$ , 125 MHz) of compound **1d**

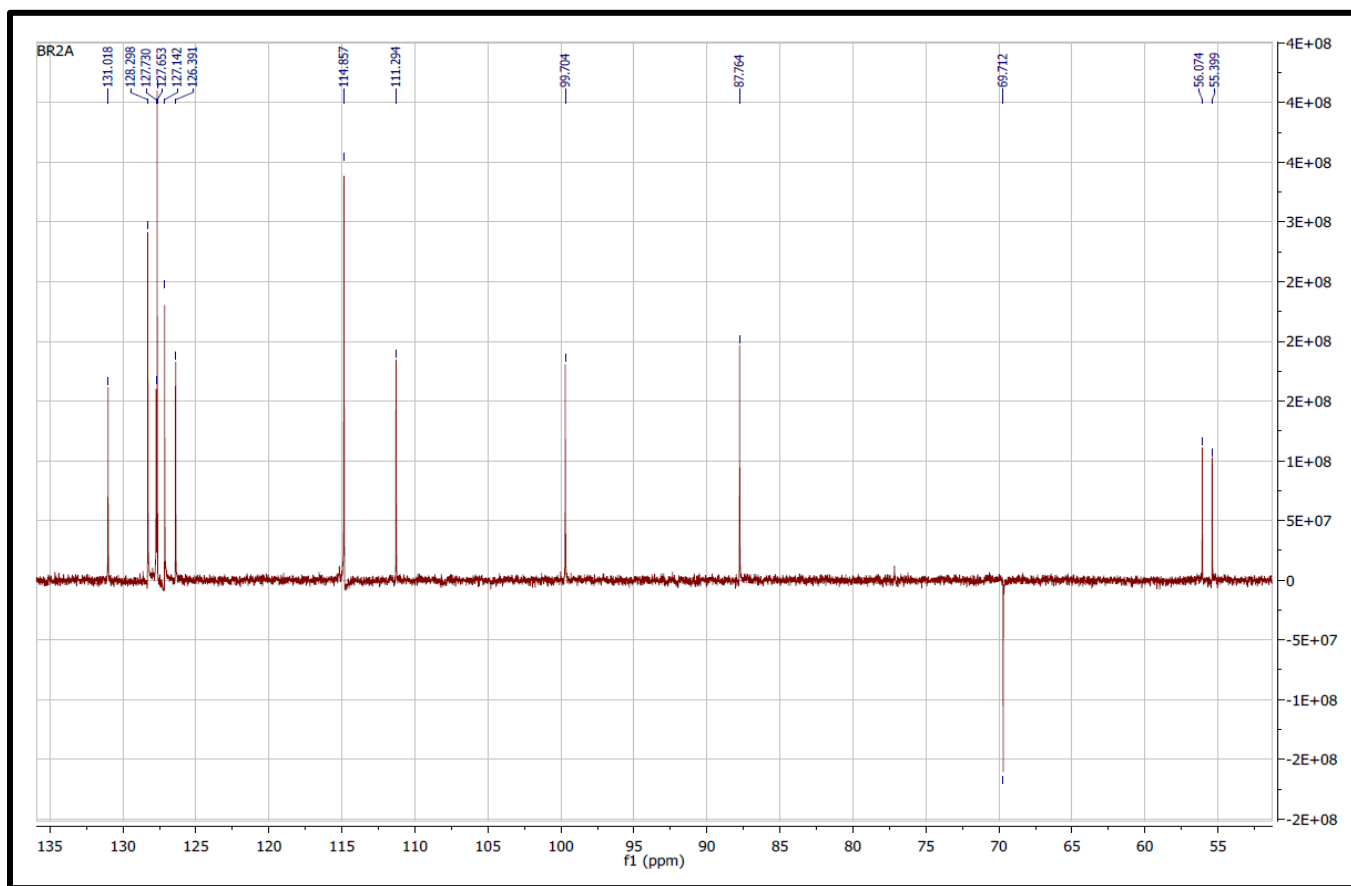

Figure S38: DEPT 135 spectrum of compound **1d**

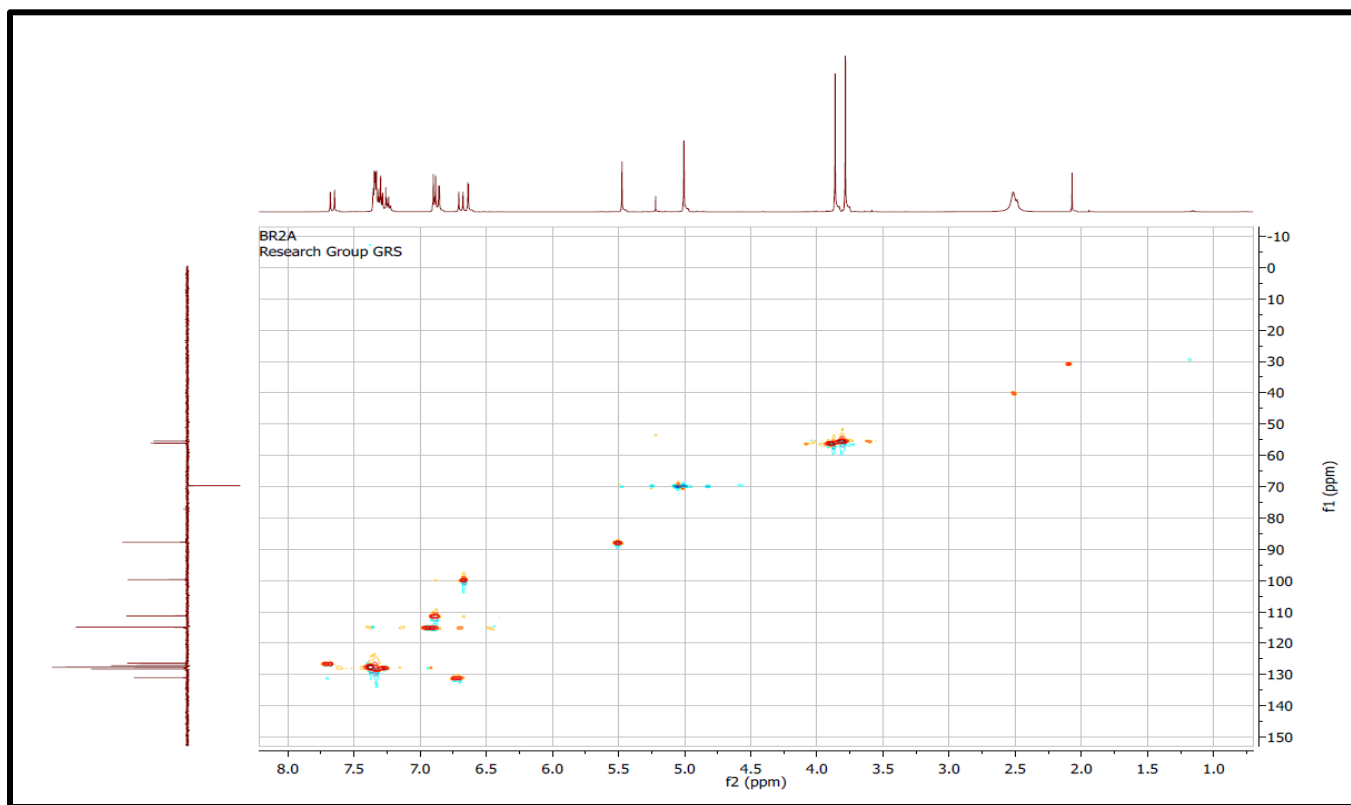

Figure S39: HSQC spectrum of compound **1d**

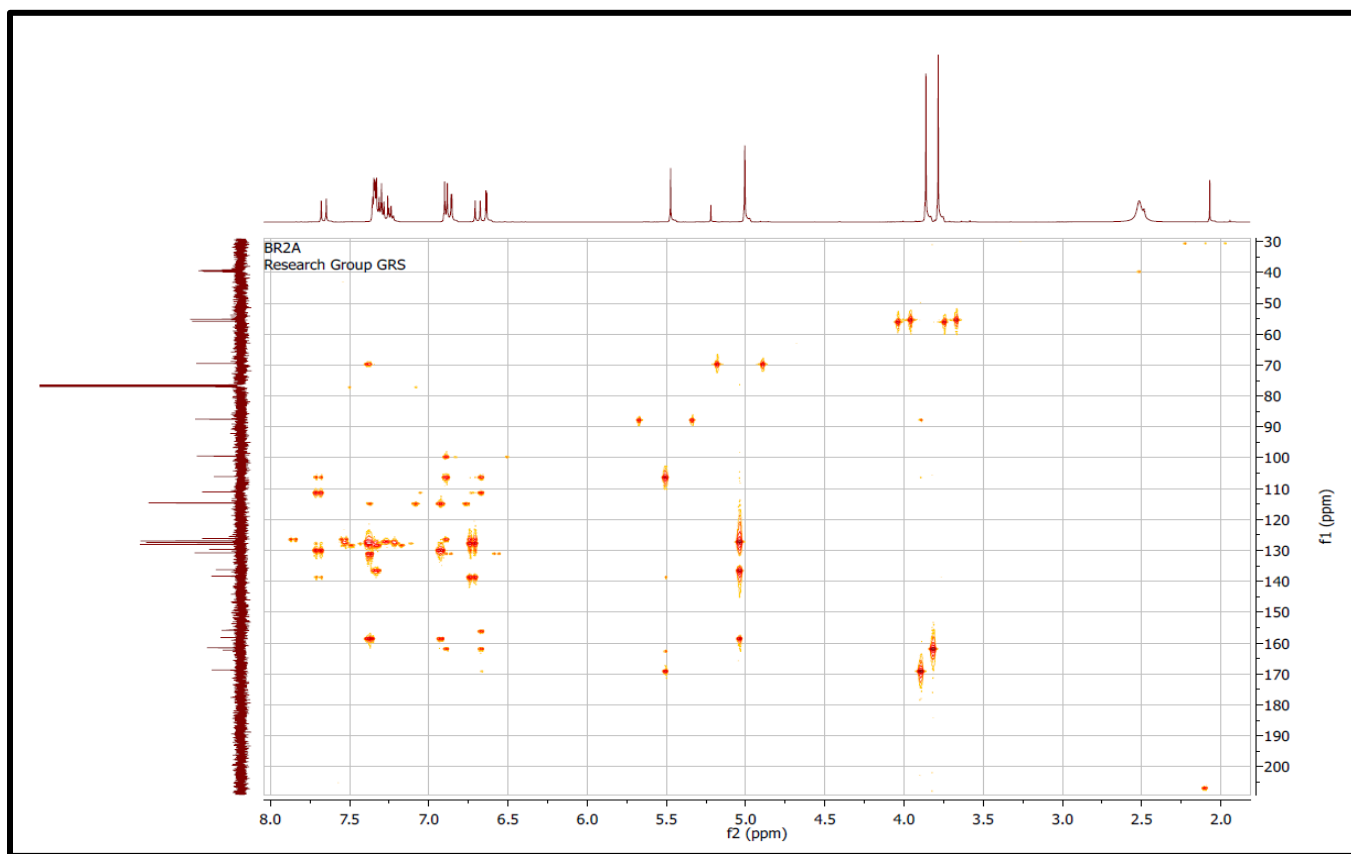

Figure S40: HMBC spectrum of compound 1d

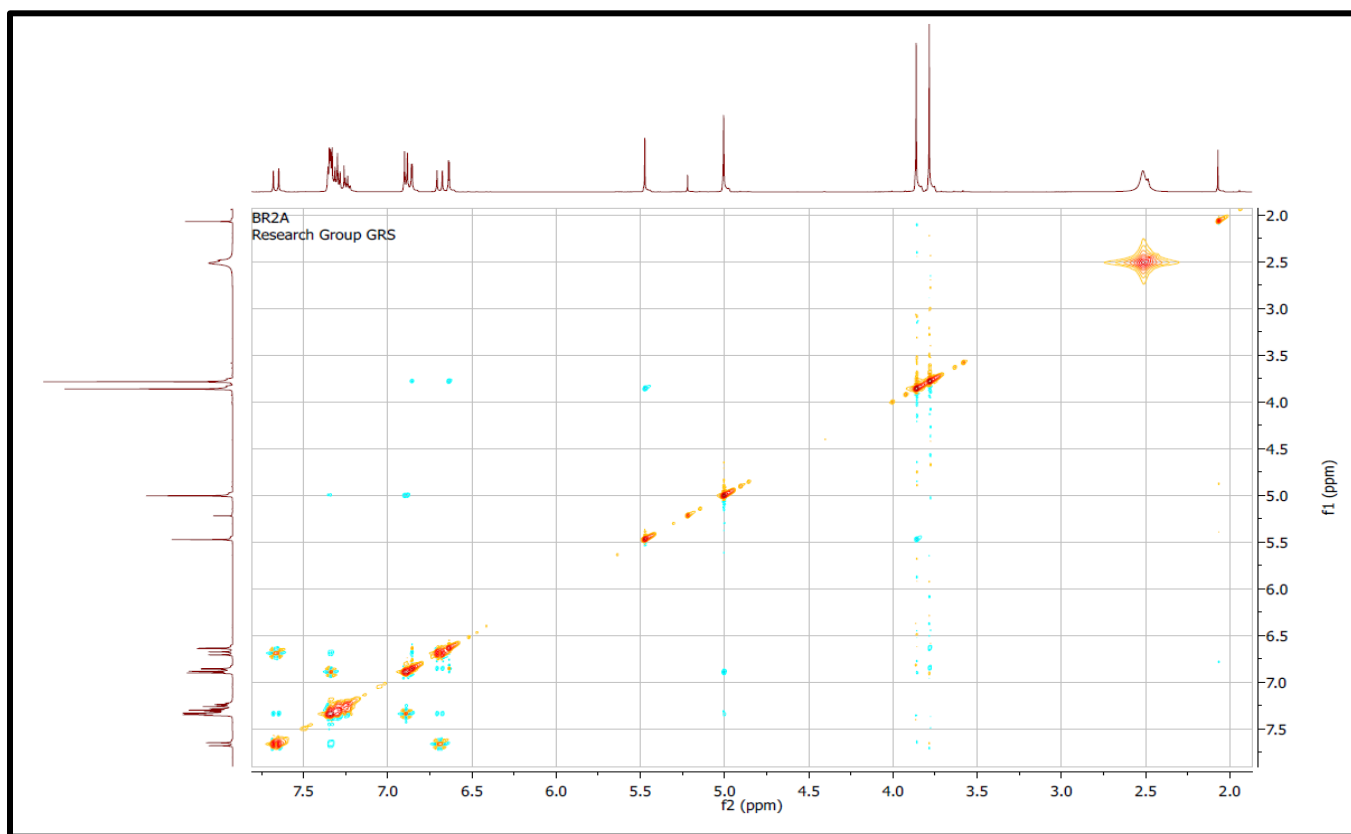

Figure S41: NOESY spectrum of compound 1d

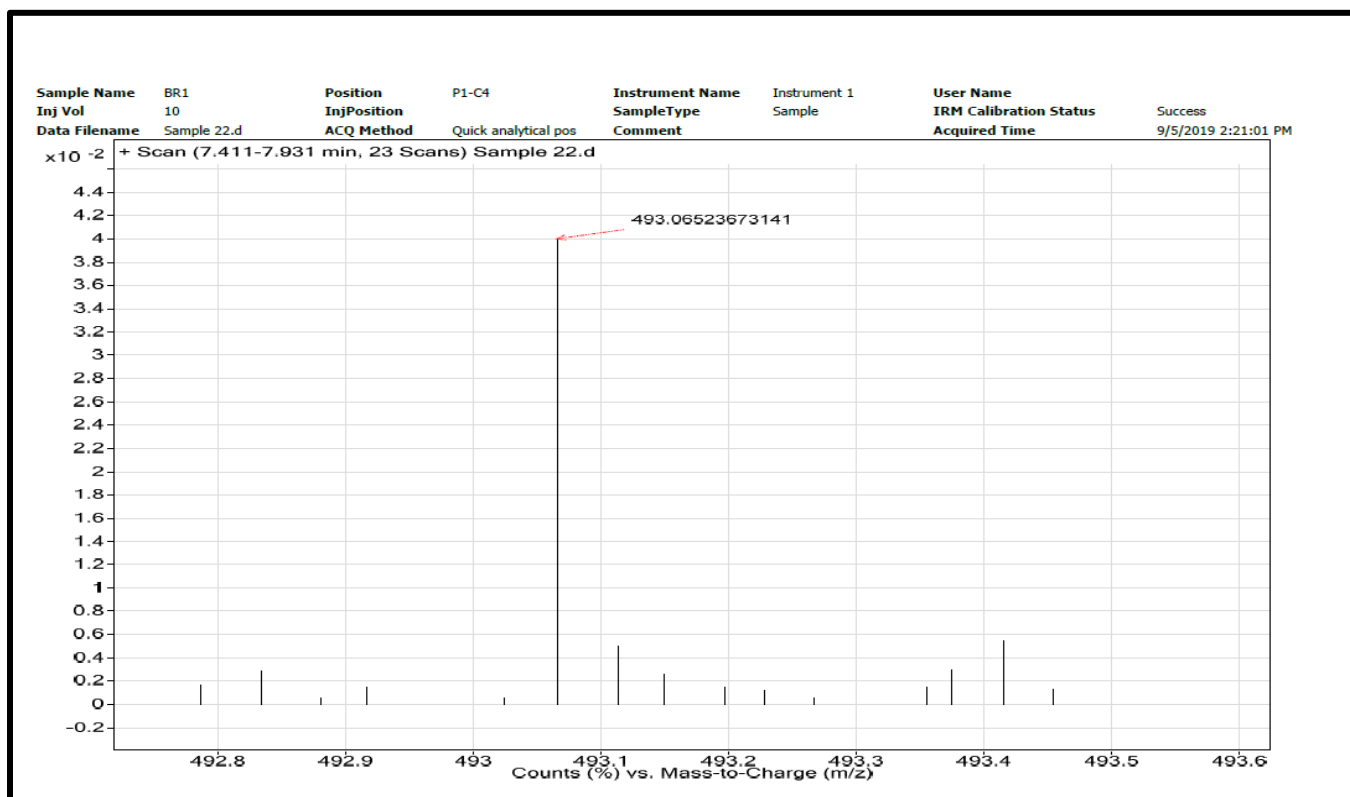

Figure S42: HRESIMS spectrum of compound 1e

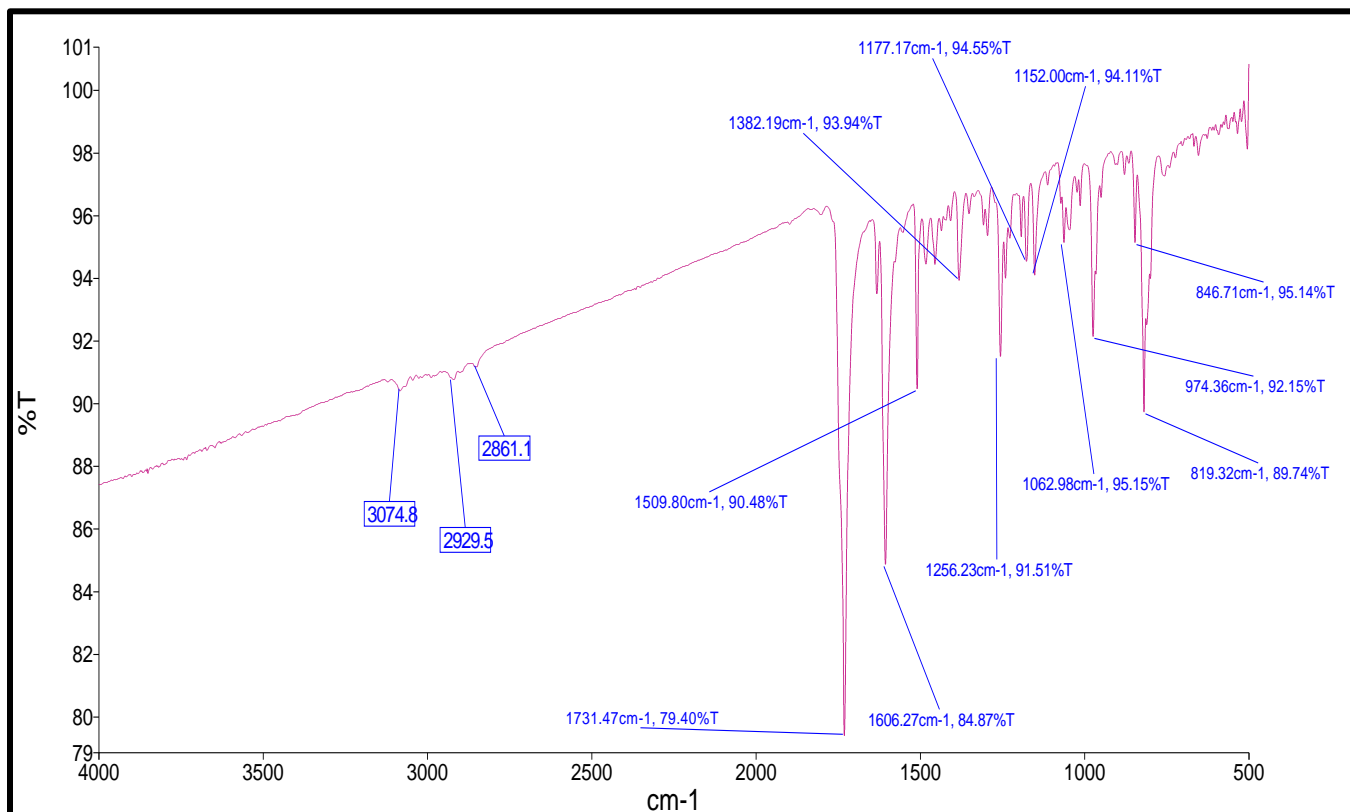

Figure S43: IR spectrum of compound 1e



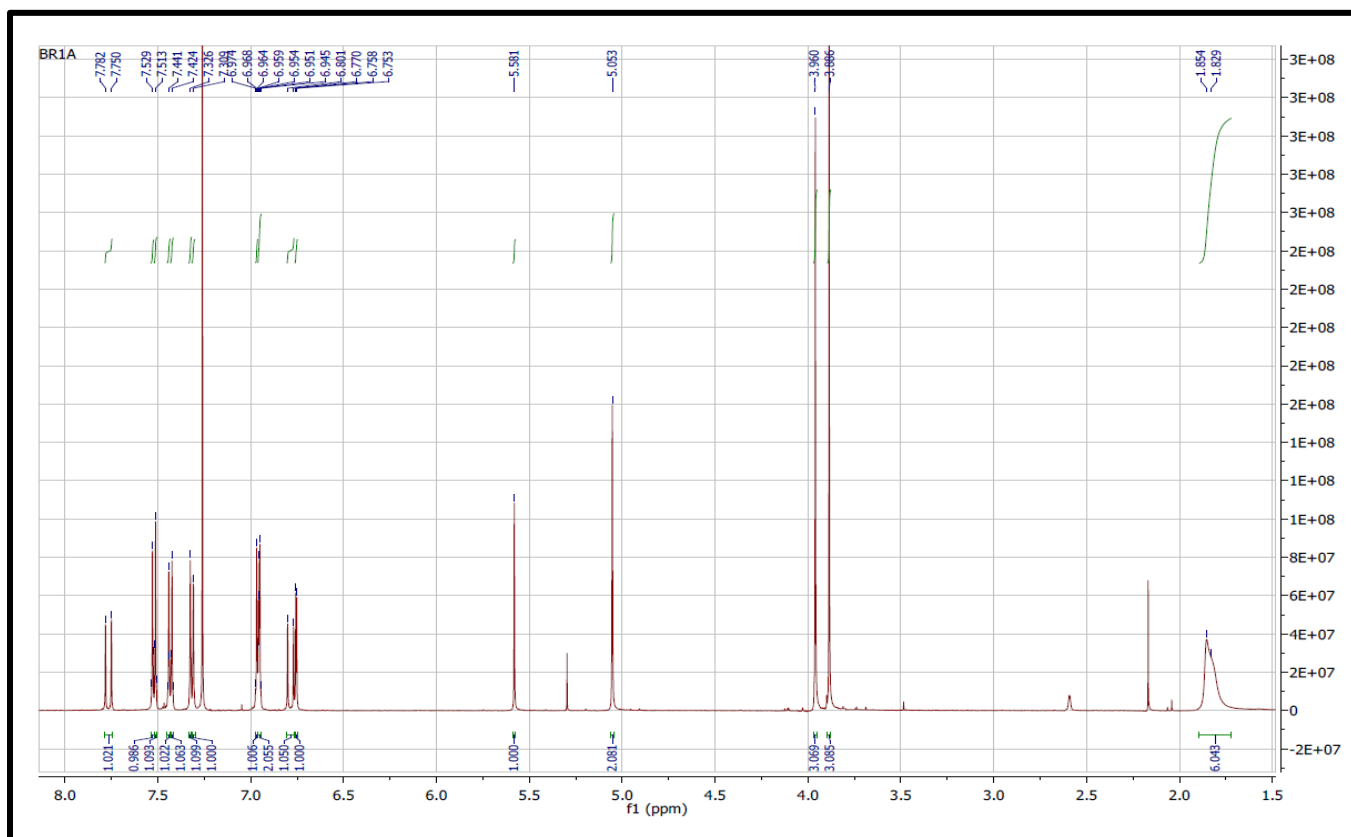

Figure S44:  $^1\text{H}$  NMR spectrum ( $\text{CDCl}_3$ , 500 MHz) of compound **1e**

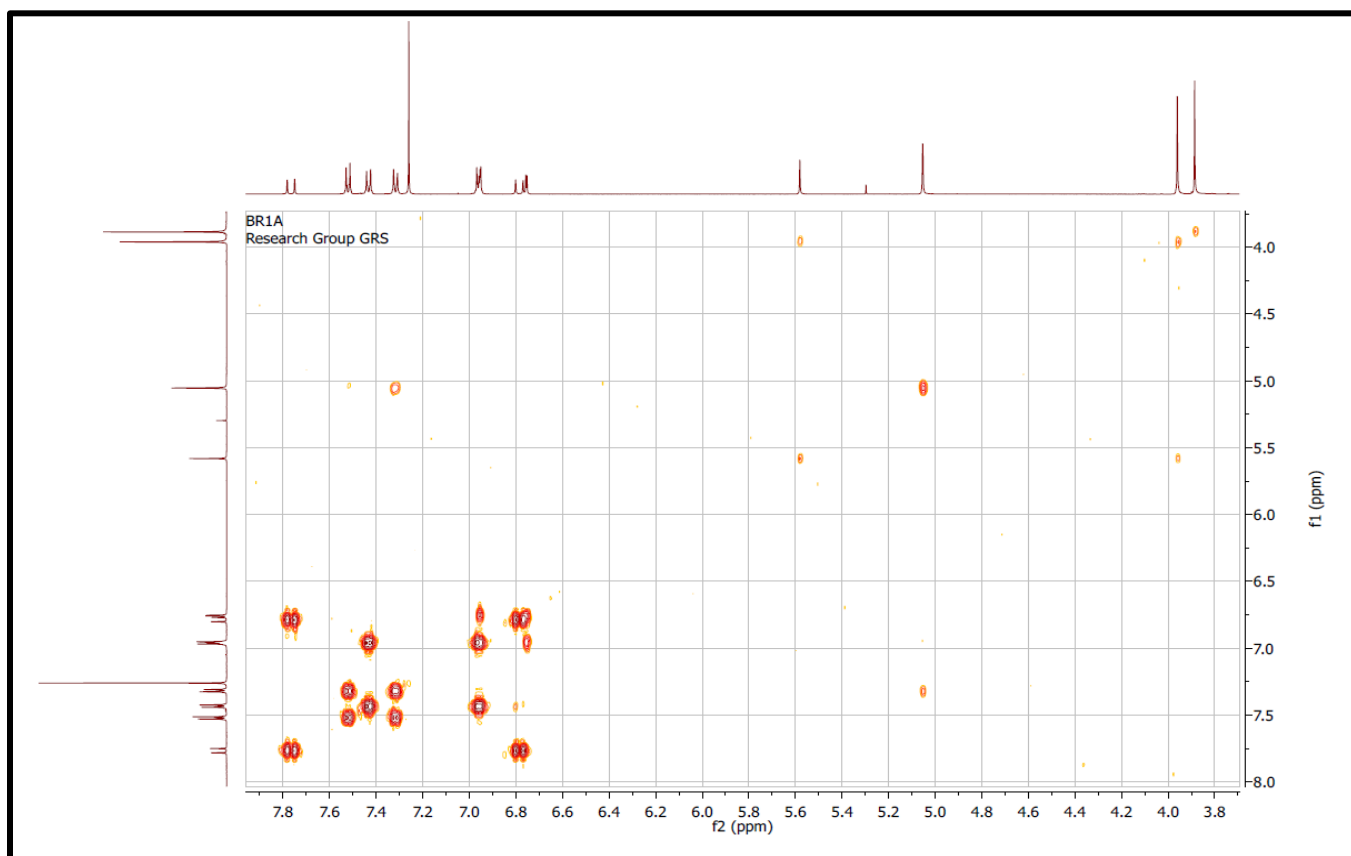

Figure S45: COSY spectrum of compound **1e**

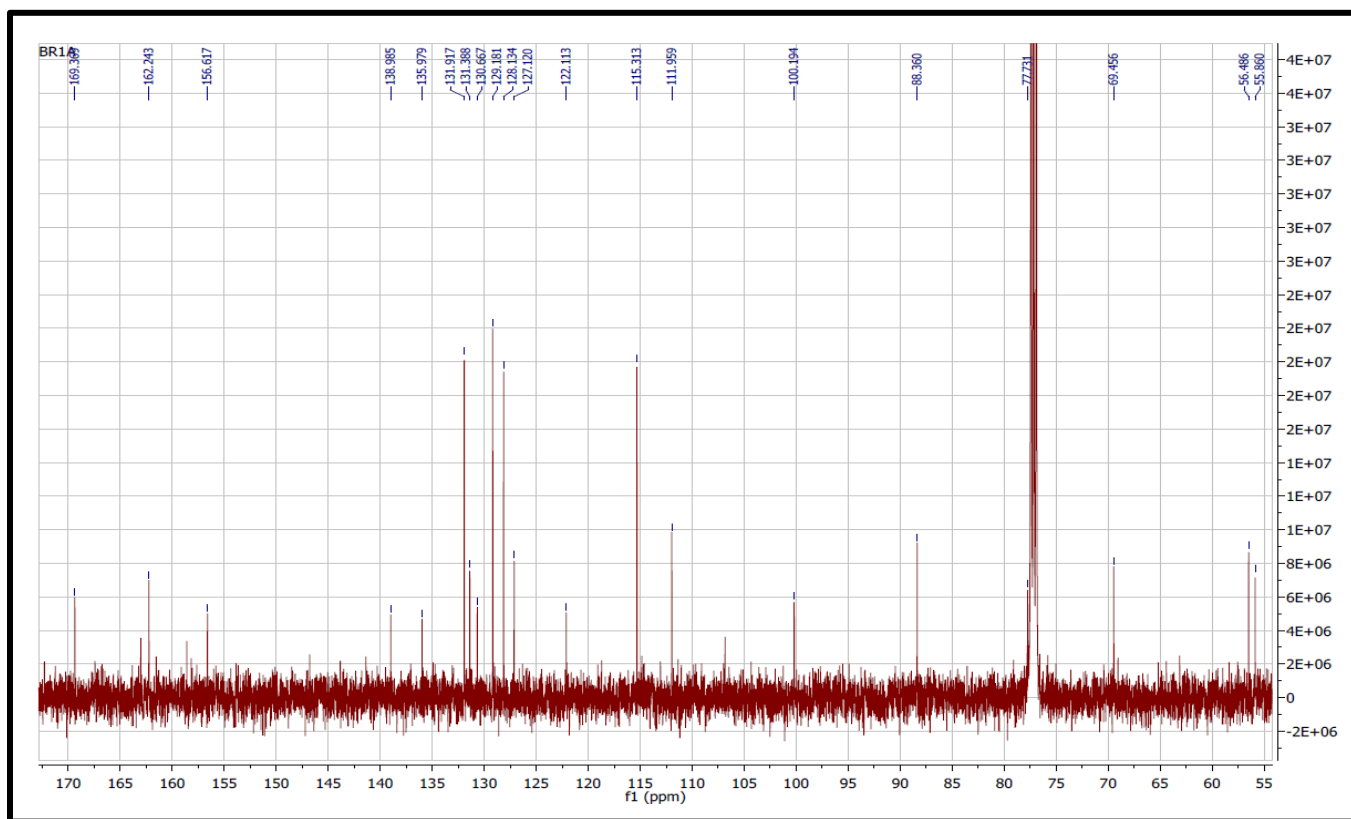

Figure S46:  $^{13}\text{C}$  NMR spectrum ( $\text{CDCl}_3$ , 125 MHz) of compound **1e**

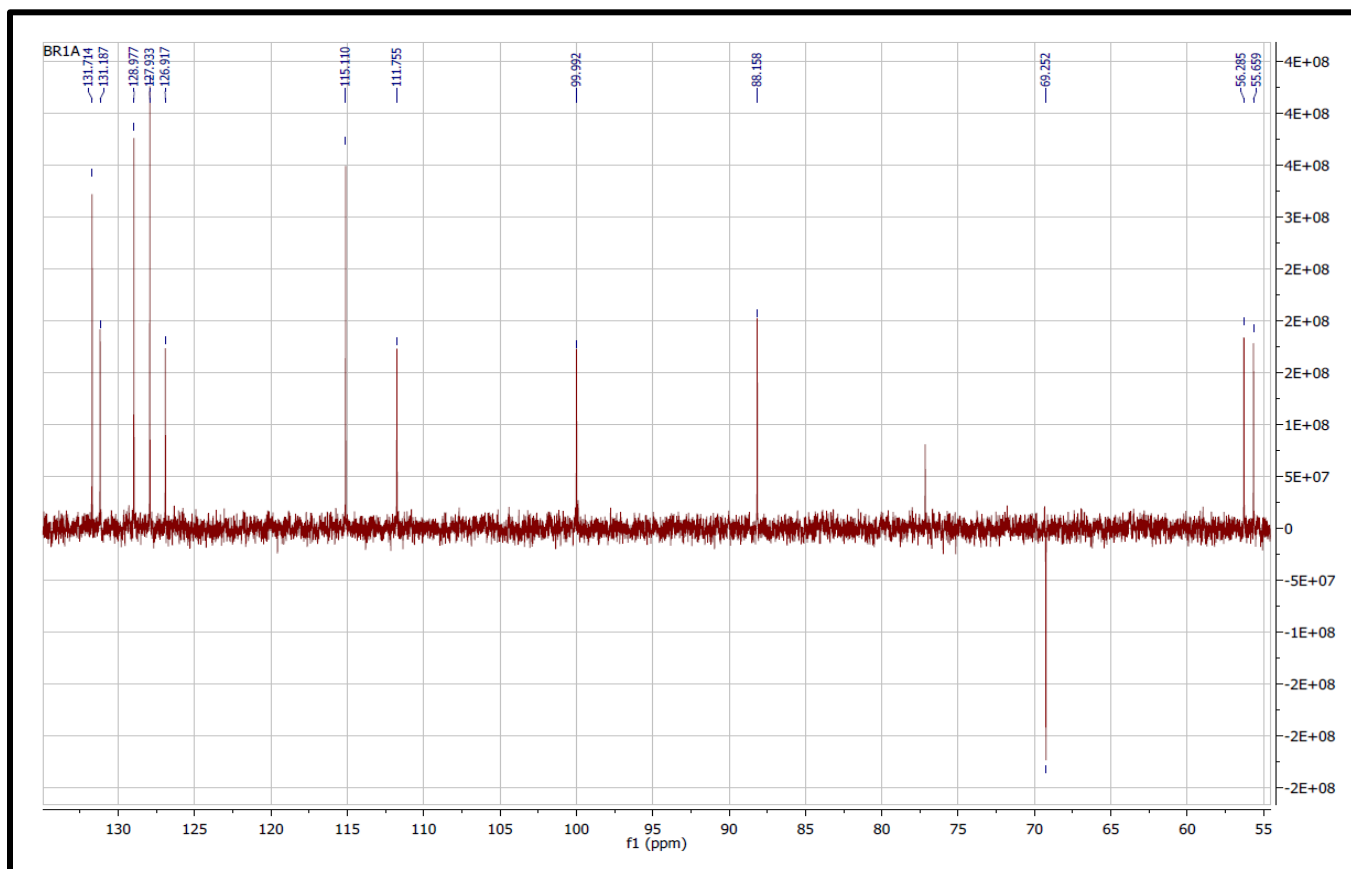

Figure S47: DEPT 135 spectrum of compound **1e**

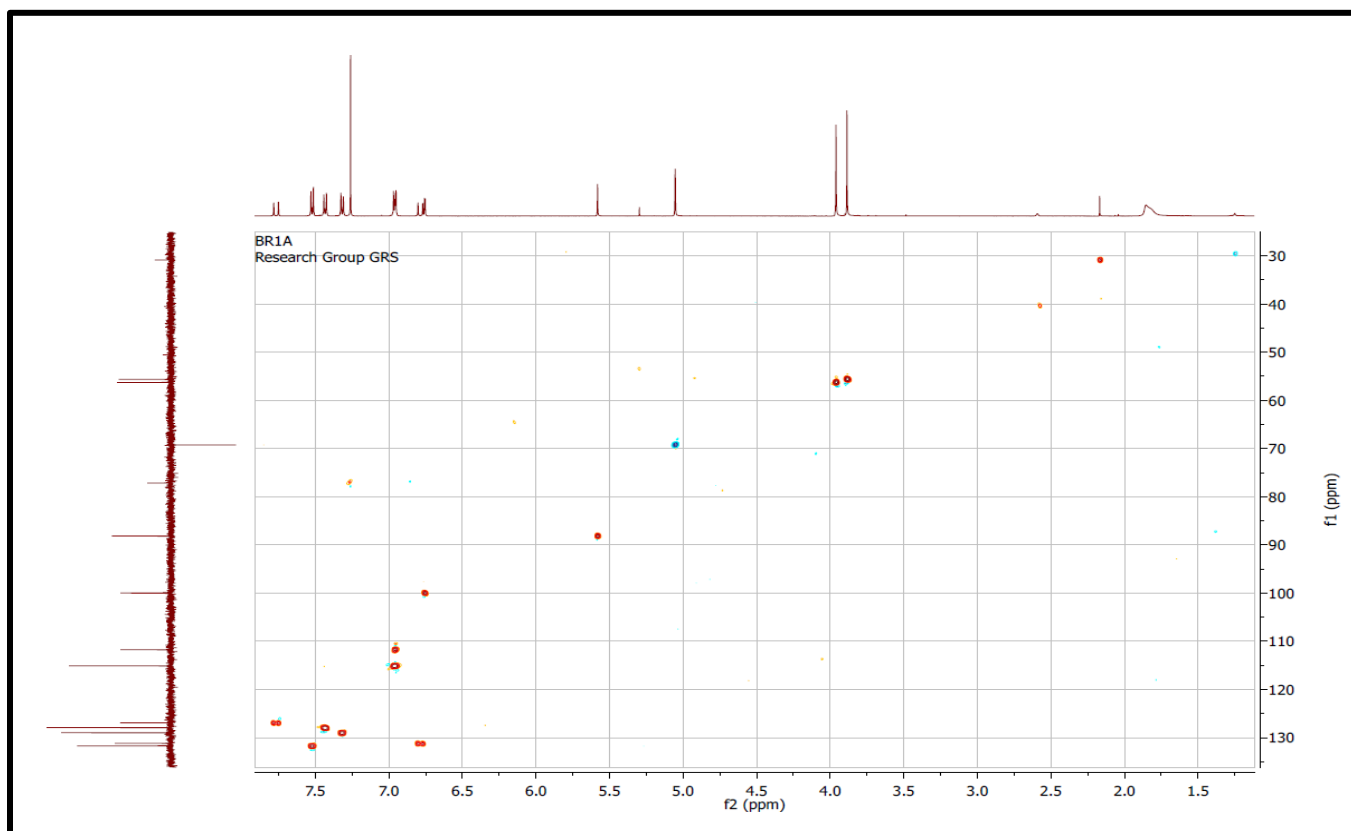

Figure S48: HSQC spectrum of compound **1e**

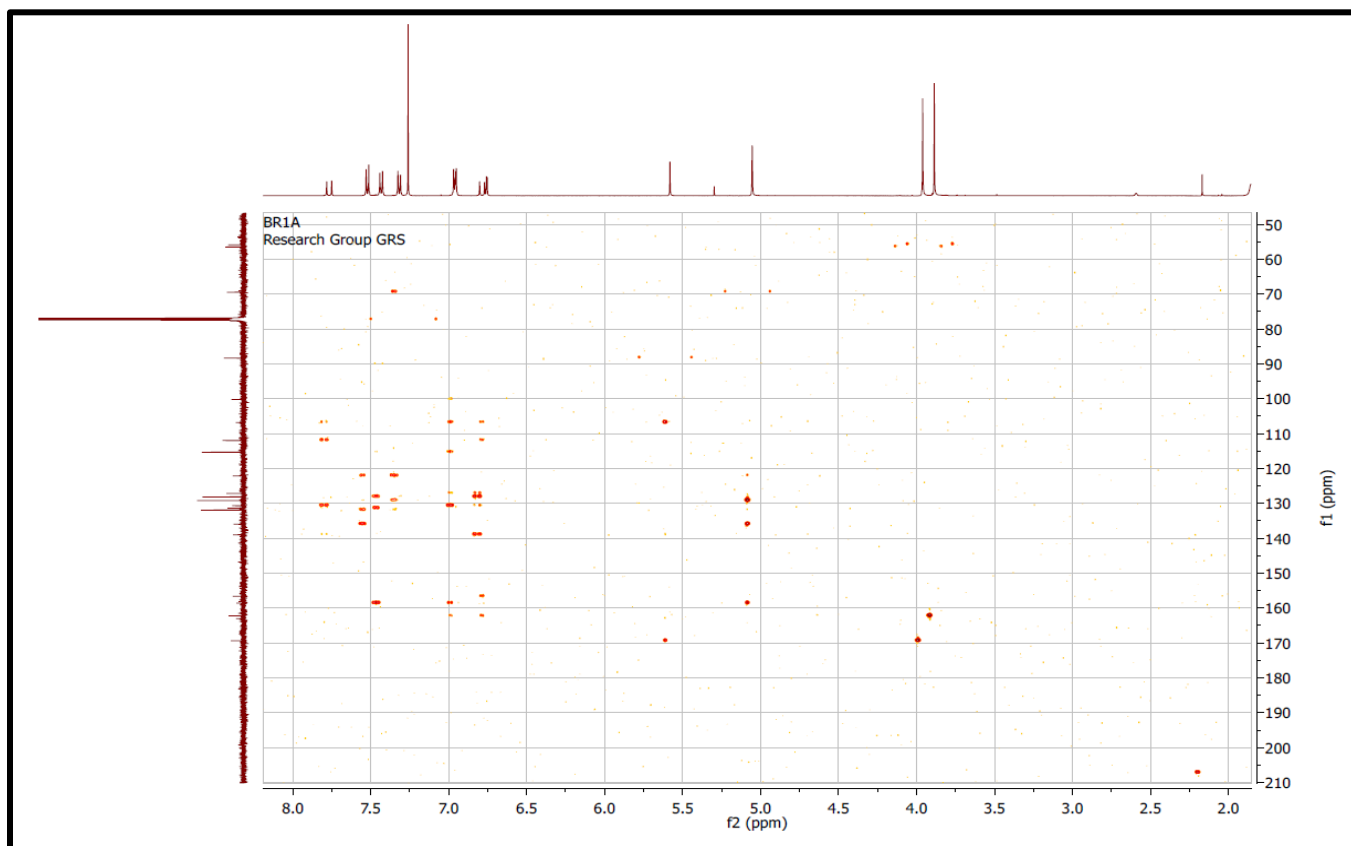

Figure S49: HMBC spectrum of compound **1e**
